1 **Neurodevelopment vs. the immune system: complementary contributions of**  
2 **maternally-inherited gene transcripts and proteins to successful egg**  
3 **development in fish**

4

5 Daniel Źarski<sup>1\*</sup>, Aurelie Le Cam<sup>2</sup>, Thomas Frohlich<sup>3</sup>, Miwako Kösters<sup>3</sup>, Christophe Klopp<sup>4</sup>,  
6 Joanna Nynca<sup>1</sup>, Sławomir Ciesielski<sup>5</sup>, Beata Sarosiek<sup>1</sup>, Katarzyna Dryl<sup>1</sup>, Jerome Montfort<sup>2</sup>,  
7 Jarosław Król<sup>6</sup>, Pascal Fontaine<sup>7</sup>, Andrzej Cierieszko<sup>1</sup>, Julien Bobe<sup>2</sup>

8

9 <sup>1</sup> Department of Gamete and Embryo Biology, Institute of Animal Reproduction and Food Research, Polish  
10 Academy of Sciences, Tuwima str. 10, 10-748 Olsztyn, Poland

11 <sup>2</sup> INRAE, UR1037 Fish Physiology and Genomics, F-35000 Rennes, France

12 <sup>3</sup> Laboratory for Functional Genome Analysis (LAFUGA), Gene Center, Ludwig Maximilian University of  
13 Munich, 81377 Munich, Germany

14 <sup>4</sup> Sigènae, UR875, INRAE, 31326 Castanet-Tolosan, France

15 <sup>5</sup> Department of Environmental Biotechnology, University of Warmia and Mazury, Olsztyn, Poland

16 <sup>6</sup> Department of Salmonid Research, The Stanisław Sakowicz Inland Fisheries Institute, Olsztyn, Poland

17 <sup>7</sup> University of Lorraine, INRAE, UR AFPA, F-54000 Nancy, France

18

19 \*Corresponding author: [d.zarski@pan.olsztyn.pl](mailto:d.zarski@pan.olsztyn.pl)

20

21 **Abstract**

22 **Background:** In Metazoans, embryonic development relies on maternally-inherited mRNAs  
23 and proteins that are critical for early developmental success and known to play major roles at  
24 later stages, beyond zygotic genome activation. However, very poor concordance between  
25 transcript and protein levels in oocytes and embryos of vertebrates suggest that maternally-  
26 inherited proteins and maternally-inherited mRNAs are playing different roles in unfertilized  
27 eggs, not considered to date comprehensively. The aim of this study was to investigate the  
28 respective contribution of maternally-inherited mRNAs and maternally-inherited proteins to  
29 egg molecular cargo and to its developmental competence using pikeperch, an ecologically and  
30 commercially relevant freshwater fish species, as a model.

31 **Results:** Our data shed new light on the importance of maternally-inherited mRNAs in nervous  
32 system development suggesting that neurogenesis is a major mRNA-dependent non-genetic  
33 inheritance factor. In contrast, our results highlight a specific role of maternally-inherited

34 proteins in immune response in ovulated eggs suggesting that maternal proteins would rather  
35 contribute to developmental success through protection of the embryo against pathogens.  
36 Further analysis revealed susceptibility of the transcriptome to modifications during the post-  
37 vitellogenic processes (i.e., final oocyte maturation and ovulation), whereas proteomic cargo  
38 remains unaffected. This may negatively affect developmental competence of the egg and  
39 possibly influence further nervous system development of the embryo.

40 **Conclusions:** Our study provides novel insights into the understanding of type-specific roles of  
41 maternally-inherited molecules in fish. Here we show, for the first time, that transcripts and  
42 proteins have distinct, yet complementary, functions in the egg of teleost fish. Maternally-  
43 inherited mRNAs would shape embryo neurodevelopment and possibly the future behavior of  
44 the fish, while maternally-inherited proteins would rather be responsible for protecting the  
45 embryo against pathogens. Additionally, we observed that processes directly preceding  
46 ovulation may considerably affect the reproductive success by modifying expression level of  
47 genes crucial for proper embryonic development, being novel fish egg quality markers (e.g.,  
48 *smarca4* or *h3f3a*). These results are of major importance for understanding the influence of  
49 external factors on reproductive fitness in both captive and wild-type fish species.

50

51

52 **Keywords:** egg quality; pikeperch; reproduction; transcriptomics; proteomics, embryo lethality

53

## 54 **1. Introduction**

55 The developmental competence of metazoans ova relies on maternally derived  
56 mRNAs (messenger ribonucleic acids) and proteins that drive cellular division until zygotic  
57 genome activation (ZGA) [1–3]. Further developmental processes in fish, including cellular  
58 differentiation, are followed by reprogramming processes upon ZGA, during which maternally

59 inherited mRNAs undergo degradation and are replaced by zygotic transcripts [4]. In this way,  
60 new proteins taking part in embryogenesis are also being produced. However, mRNA  
61 degradation upon ZGA is most likely a prolonged process during which selective degradation  
62 (targeted to specific mRNAs) occurs [5,6]. Consequently, it has been found that many mRNAs  
63 of maternal origin participate in embryonic development well beyond ZGA, consequently  
64 representing a potential nongenetic inheritance pathway [7]; this also probably applies to  
65 maternally derived proteins. It is therefore clear that both sets of molecules – transcripts and  
66 proteins – of maternal origin are important factors in embryonic development. The lacking or  
67 very poor concordance between protein and transcript levels in mammalian oocytes during early  
68 development [8] and in *Xenopus laevis* eggs and early embryos [9] suggests that maternally  
69 derived proteins and mRNAs play different roles during embryogenesis. This hypothesis is  
70 additionally supported by a study on zebrafish (*Danio rerio*), in which different functions of  
71 transcripts and proteins were suggested in the embryos at 24 h post fertilization [10]. However,  
72 this study was performed on embryos at a late stage of embryonic development (during  
73 advanced organogenesis, long after ZGA), representing molecular consequences stemming  
74 from maternal and paternal factors as well as their interactions. Therefore, there is still a lack  
75 of consideration of the specific roles of the two types of molecules of purely maternal origin in  
76 unfertilized ova of vertebrates, including fishes. This knowledge is of the highest importance  
77 for understanding and identifying the processes and mechanisms responsible for the  
78 reproductive capacity of teleost fishes.

79         In finfishes, oogenesis is the process of oocyte growth, during which proteins and  
80 lipids are deposited into the oocyte [11,12], followed by final oocyte maturation (FOM), during  
81 which reorganization of cellular structures occurs [13–15]. This latter process, considered  
82 translationally quiescent, is accompanied by transcription within the ovaries, and genomic  
83 maturation [12,16] leads to the deposition of maternally derived molecular cargo in the

84 ovulated, fully mature egg. Upon ovulation, eggs remain transcriptionally and translationally  
85 silent or significantly repressed until ZGA [17,18]. Among the egg constituents, many research  
86 efforts have focused on fats and the major fraction of proteins (such as vitellogenins), which  
87 serve as nutrients for developing embryos and larvae (as constituents of the yolk sac)  
88 [12,19,20]. However, in recent years, increasing attention has been focused on transcripts and  
89 the remaining proteins that contribute to embryonic development. There are a number of studies  
90 showing that either transcriptomic [1,17,21–24] or proteomic profiles [25,26] may be used for  
91 predicting egg quality and indicating their importance in the developmental competence of  
92 eggs. A comparative transcriptomic-proteomic analysis of fully grown ovarian follicles (before  
93 ovulation) of zebrafish (*Danio rerio*) identified only a small number (approximately 60) of  
94 proteins [27]. Another study characterized the proteome and transcriptome of zebrafish  
95 embryos at late developmental stage (i.e., 24 h post fertilization), linking the two types of  
96 molecules to crucial developmental processes [10]. However, these studies did not consider the  
97 developmental competence of the eggs analyzed and referred to only a single model species.  
98 Data on integrated transcriptomic-proteomic analysis from other ecologically and commercially  
99 relevant species are still missing. Consequently, a large knowledge gap related to the  
100 characterization of the proteome and transcriptome in fully competent ovulated eggs still exists.  
101 Additionally, a linkage between transcriptomic-proteomic profiling and the developmental  
102 competence of eggs is not available for teleosts. Such information could allow us to identify  
103 the processes for which the two types of molecules are responsible and would be indispensable  
104 in understanding their role in developing fish embryos. This may further the identification of  
105 factors determining egg quality, and more generally factors involved in reproductive biology,  
106 in finfishes.

107           Egg quality in finfishes has serious implications for wild and captive stocks. It has  
108 been identified as a crucial factor determining the effectiveness of natural recruitment and

109 commercial production [12,28,29]. Therefore, egg quality – defined as the ability of the oocyte  
110 to be fertilized and develop into normal embryos [30] – is attracting much attention from  
111 scientists. This allowed us to identify basic extrinsic (such as environmental or nutritional  
112 factors) and intrinsic (e.g., *in vivo* aging) determinants of egg quality in finfishes [22,29,31].  
113 However, despite the great progress that has been made, the processes involved in the  
114 determination of egg quality are still poorly understood. It should be emphasized that this  
115 knowledge is of great importance for understanding the reproductive biology of finfishes, the  
116 management of wild stocks and the aquaculture industry [12,29].

117 Most of the studies considering egg quality at the molecular level have focused on  
118 farmed or model fishes, where a similar approach of categorizing particular samples as either  
119 high or low quality has been implemented. This has included the collection of subsamples for  
120 molecular analysis immediately after egg collection and monitoring the developmental  
121 competence (by determining the embryonic survival rate at various stages of development) of  
122 an equivalent subsample during parallel incubation. This approach, although state-of-the-art  
123 [29], does not exclude any groups of eggs, a considerable disadvantage. The eggs collected  
124 from domesticated fish are of various qualities (including those showing symptoms of  
125 overripening and/or intraovarian aging processes), and therefore it is possible that molecular  
126 analysis may be performed in cells that are suffering from a lack of basic structural integrity  
127 and/or undergoing internal disintegration (also at the molecular level) [24,32–34]. The inclusion  
128 of eggs with considerably altered fertilization capacity (which is an important component of  
129 egg quality definition [30]), creates the risk of masking many important molecular relationships,  
130 limiting the further development of our knowledge. These approaches may also lead to the  
131 mixing of unfertilizable eggs with eggs having altered molecular machinery leading to early  
132 embryonic lethality – two distinct phenomena. Initial preselection was considered in a study by  
133 Źarski et al. [21], where eggs of seabass (*Dicentrarchus labrax*) characterized by apparent

134 abnormalities (as practiced in commercial hatcheries) were discarded from analysis.  
135 Additionally, in a recent study on rainbow trout (*Oncorhynchus mykiss*), eggs characterized by  
136 overmaturation were excluded from the analysis [17]. These approaches provide new insights  
137 into the molecular mechanisms conditioning egg quality, highlighting the good potential of  
138 preselecting eggs for molecular analysis. However, in the study of Źarski et al. [21], the strategy  
139 undertaken (based on evaluating embryonic survival rate at the 4-cell stage, i.e., 3 h post  
140 fertilization) led to the analysis of groups of eggs featuring high variation in quality, which was  
141 another limiting factor in such studies. Therefore, a more careful preselection approach based  
142 on precisely chosen quality-related indices provides an opportunity to expand our knowledge  
143 and would allow us to focus on the molecular mechanisms leading to early lethality (and not  
144 related to a fundamental lack of fertilizability), which have been barely considered to date [17].

145         The aim of this study was to characterize the transcriptomic and proteomic profile of  
146 high-quality eggs using pikeperch (*Sander lucioperca*) as a model, the top predator of Holarctic  
147 freshwater bodies with high commercial interest [35,36], and to perform a comparative  
148 functional gene set enrichment analysis of the two types of molecules. Next, a comparative  
149 analysis of the transcriptomes and proteomes obtained from pikeperch eggs characterized by  
150 high and low quality – following a specifically developed preselection procedure – was  
151 performed to thoroughly characterize the respective contribution of maternally-inherited  
152 mRNAs and maternally-inherited proteins to egg developmental competence.

153

## 154         **2. Material and methods**

### 155         *2.1. Ethics statement*

156         All procedures requiring animal handling (such as reproductive procedures) were  
157 performed in compliance with European and national regulations on animal welfare and ethics  
158 in experimentation on animals. Whenever appropriate, the procedures were approved by the

159 Lorraine Ethics Committee for Animal Experimentation (CELMEA; APAFIS-  
160 2016022913149909).

161

## 162 *2.2. General study design*

163 The study comprised of two separate objectives:

- 164 1. Objective no. 1: aimed to explore the integrated transcriptomic-proteomic  
165 profile of high-quality eggs;
- 166 2. Objective no. 2: aimed at comparative transcriptomic-proteomic analysis of  
167 eggs characterized by either high or low quality.

168 Eggs were collected and developmental competence (quality) was evaluated with the  
169 same methods in realization of both objectives (described below). Transcriptomic and  
170 proteomic analyses were also the same during the realization of the two objectives. Real-time  
171 qPCR validation of candidate genes was performed only during realization of objective no. 2.  
172 *In silico* and functional gene set enrichment analyses were performed separately for the two  
173 scientific objectives undertaken, as specified below.

174

## 175 *2.3. Broodstock management and reproductive procedures*

176 Pikeperch broodstock (Asialor fish farm, Pierrevillers, France) grown in recirculating  
177 aquaculture system (RAS) with fully controlled environmental conditions was used for the  
178 study. The RAS was equipped with UV sterilizers, biological filtration and a drum filter to  
179 ensure appropriate solids removal. The oxygen levels were kept at >80% saturation, ammonia  
180 in the range between 0.2–1.1 mg L<sup>-1</sup>, and nitrite between 0.05–0.70 mg L<sup>-1</sup>. The temperature  
181 (within a range of 8–23°C, ±0.5°C) and photoperiod (±1 min) were controlled automatically.  
182 The fish had already spawned 3 times before the study was conducted, meaning that they were  
183 identified as fully ‘functional’ spawners. To promote the annual gonadal cycle, the fish were

184 exposed to annual fluctuations in the photothermal program described by Fontaine et al. [37]  
185 as further modified by Żarski et al. [38] so that the fish were exposed to a wintering period  
186 (with temperature below 10°C) for 4 months. Fish were fed throughout the year at a rate of 0.2-  
187 1% biomass, depending on the temperature and apparent satiation, with compound feed (50%  
188 protein, 11% fat, 10% moisture, 1.55% crude fiber, 1.35% phosphorus, 9.5% ash, and 17.9%  
189 nitrogen-free extract; Le Gouessant, France) [38].

190           Controlled reproduction of the fish was performed according to state-of-the-art  
191 protocols. In total, 60 males and 60 females were reproduced following the methods described  
192 by Żarski et al. [38]. For induction of ovulation and spermiation, human chorionic gonadotropin  
193 (hCG; Chorulon, Intervet, France) was injected into each fish intraperitoneally at doses of 250  
194 and 500 IU kg<sup>-1</sup> for males and females, respectively. At the time of hormonal treatment, the  
195 maturation stage of each fish was scored with the use of catheterization (as described by Żarski  
196 et al. [14]). All the fish were identified to be in maturation stage I (representing postvitellogenin  
197 oocytes entering the FOM process) out of 6 distinct stages [14]. Next, the fish were periodically  
198 monitored for ovulation by gentle pressure of the abdomen. When a particular female was found  
199 to have ovulated, the eggs were collected into individual sealable, dry, plastic containers and  
200 kept at temperatures between 8-10°C for less than 30 min prior to further procedures. Sperm  
201 were collected into dry disposable syringes at between 5 and 7 days following hormonal  
202 stimulation (as recommended by Żarski et al. [39]) and were stored at 4°C prior to use (not  
203 longer than 15 min), as is practiced in commercial production.

204           Each collected egg batch was aliquoted into 3 portions. Portion 1 was subportioned  
205 into individually labeled cryotubes and immediately snap frozen in liquid nitrogen (later stored  
206 at -80°C prior to proteomic and transcriptomic analysis). The second portion was subjected to  
207 a preselection procedure (as described further). Portion 3 was subjected to fertilization to assess  
208 the egg quality indices.



209           During the controlled reproduction, the photoperiod was set to 14 h of light per day  
210 (provided with neon tube lights), and the temperature was maintained at 12°C from the day of  
211 injection until the end of the experiment. Before each manipulation (catheterization, ovulation  
212 control, gamete collection, etc.), fish were anesthetized with MS-222 (150 mg L<sup>-1</sup>; Sigma-  
213 Aldrich) [40].

214

#### 215    2.4. Preselection procedure

216           The preselection procedure is illustrated in Fig. 1. The procedure included placement  
217 of the eggs on a plastic Petri dish (to prevent excessive surface adhesiveness of the eggs – a  
218 natural feature of pikeperch eggs) and their evaluation under the stereomicroscope for  
219 fragmentation of lipid droplets (an indicator of lower quality eggs in percids; [41]) or any other  
220 aberrations (symptoms of aging or lack of structural integrity). For the next step, only eggs of  
221 normal appearance were used. Next, the eggs were activated with hatchery water, and cortical  
222 reaction intensity was evaluated at 3-5 min post water activation, which is a specific quality  
223 indicator of pikeperch eggs [42]. The eggs exhibiting at least 90% cortical reaction were further  
224 observed for up to 30 min following activation. This was done to determine whether the eggs  
225 were able to form blastodiscs at the animal pole (indicating their fertilization capacity – for  
226 details, see Żarski et al. [42]), as only the eggs exhibiting blastodisc formation are capable of  
227 cellular cleavages following fertilization. The eggs exhibiting a lack of animal poles formation,  
228 internal damage or any other irregularities were not considered in further steps of the study (Fig.  
229 1). This preselection procedure allowed us to discard the eggs exhibiting apparent symptoms of  
230 lower quality and consider only those eggs with a normal appearance and the potential to be  
231 fertilized – an important component of egg quality definition [30]. Consequently, eggs  
232 characterized by early lethality were considered to allow us to shed new light on the molecular  
233 processes that condition the developmental competence of the eggs.

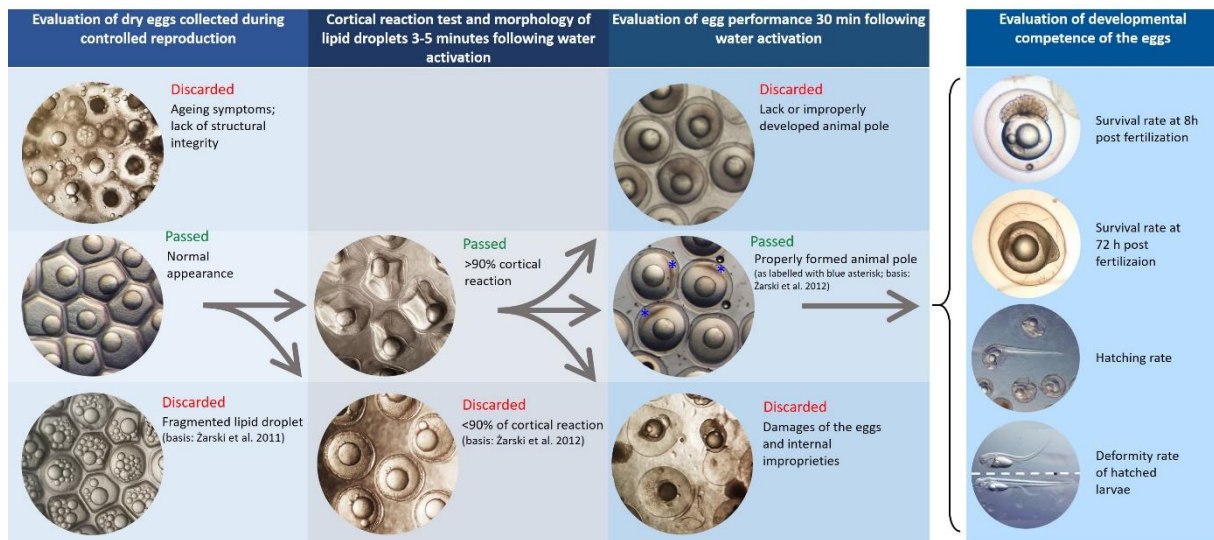

234

235 Fig. 1. Illustration of the preselection strategy of the pikeperch eggs for the comparative transcriptome and  
 236 proteome analysis in relation to the developmental competence of the eggs.  
 237

237

## 238 2.5. Gamete management and fertilization

239 To assess the egg quality indices, the eggs were subjected to controlled fertilization  
 240 according to the procedure described by Roche et al. [43]. Briefly, 5 ml of hatchery water was  
 241 poured over individually labeled glass Petri dishes (30 mm in diameter). Next, a sample of eggs  
 242 (approximately 100 eggs at one time) was placed onto the Petri dish simultaneously with 50  $\mu$ l  
 243 of a sperm sample (pooled sperm obtained from three males each time). Next, the content of  
 244 the Petri dish was hand-shaken for approximately 10 s to disperse the semen and promote  
 245 fertilization. Later, the eggs were evenly dispersed across the Petri dish (by gentle hand-mixing)  
 246 so that they could sediment and adhere to the bottom of the dish (pikeperch eggs exhibit strong  
 247 adhesiveness to glass surfaces). After 5-10 min, each Petri dish was washed carefully with  
 248 hatchery water to remove excess sperm and other residues. The eggs were further incubated  
 249 while adhered to these Petri dishes in an individual 500 ml beaker. The water temperature  
 250 during incubation was 12°C. Two Petri dishes (duplicates) were established for each egg sample  
 251 from each female.

252 For fertilization, freshly collected sperm samples exhibiting at least 80% cell motility  
 253 (verified under a light microscope at  $\times 400$  magnification for each sample as described by Cejko

254 et al. [44]) were always used. The sperm were pooled shortly before use for fertilization, as  
255 recommended by Schaefer et al. [45].

256

### 257 *Evaluation of egg quality indices and designation of samples for molecular analysis*

258 During the incubation period, three indices were recorded: the survival rate (SR) of  
259 embryos at 72 h post fertilization (by direct counting of live and dead eggs under a  
260 stereomicroscope), hatching rate (HR) of larvae and deformity rate (DR) of hatched larvae.  
261 Evaluation of HR was conducted for 5 days (between the 9<sup>th</sup> and 14<sup>th</sup> days post fertilization),  
262 during which hatched larvae were removed each day from the incubators and counted manually.  
263 Next, the larvae were anaesthetized (MS-222, 150 mg L<sup>-1</sup>), and each specimen was individually  
264 scored for the occurrence of larval deformity as described previously [46,47]. DR was  
265 calculated as follows:  $DR = 100 \times \text{number of larvae showing deformity} / \text{total number of larvae}$   
266 hatched. The analysis was performed with GraphPad Prism 9 software (GraphPad Software,  
267 San Diego, CA, USA).

268 For characterization of the transcriptomic and proteomic profiles, 8 egg batches were  
269 characterized by high egg quality (SR > 85%, HR > 60%, and DR < 15%; [47,48]). For the  
270 comparative analysis of high- and low-quality eggs, the five samples characterized by the  
271 highest egg quality and the five samples characterized by the lowest egg quality among the  
272 preselected samples were used.

273

### 274 *2.6. RNA extraction*

275 Total RNA was extracted from 50 mg of eggs (approx. 50 eggs) using a Total RNA  
276 Mini kit (Cat. No. 031-25; A&A Biotechnology, Gdynia, Poland) following the manufacturer's  
277 protocol. Next, the genomic DNA from the samples was removed using a Clean-Up RNA  
278 Concentrator (Cat. No. 039-100C; A&A Biotechnology, Gdynia, Poland) according to the

279 manufacturer's protocol. The concentration of RNA obtained was measured with a NanoDrop  
280 2000 instrument (Thermo Fisher Scientific, Wilmington, DE, USA). The quality of the RNA  
281 was verified with a 2100 Bioanalyzer (Agilent Technologies Inc., Santa Clara, CA, USA). All  
282 the samples had RIN (RNA integrity number) values higher than 9.5. The total RNA obtained  
283 was aliquoted into two portions and stored at -80°C prior to further analysis. One portion was  
284 used for transcriptomic profiling, and the other portion was used for validation of candidate  
285 genes with quantitative real-time polymerase chain reaction (qPCR).

286

### 287 *2.7. Transcriptomic profiling*

288 Transcriptomic profiling of the samples was performed with pikeperch-specific  
289 microarrays (8×60k, Agilent), which were designed and successfully validated previously (for  
290 details, see Żarski et al. [47]). The microarray design can be accessed via the Gene Expression  
291 Omnibus [49] platform under accession number GPL27937. For analysis, the samples were  
292 randomly distributed on the microarray slides. Labeling and hybridization of the samples on  
293 the microarrays was performed according to the 'One-Color Microarray-Based Gene  
294 Expression Analysis (Low-Input QuickAmp Labeling)' protocol from the manufacturer  
295 (Agilent). Briefly, 150 ng of total RNA from each sample was amplified and labeled using Cy3-  
296 CTP. The yield (>1.65 µg cRNA) and specific activity (>9 pmol of Cy3 per µg of cRNA) of the  
297 Cy3-cRNA produced were checked with a NanoDrop instrument. From the Cy3-cRNA  
298 preparation, 1.65 µg was fragmented and hybridized on a subarray. Hybridization was carried  
299 out for 17 h at 65 °C in a rotating hybridization oven. Next, the array was washed and scanned  
300 with an Agilent Scanner (Agilent DNA Microarray Scanner, Agilent Technologies, Massy,  
301 France) with standard parameters for a 8×60 K gene expression oligoarray (3 µm and 20 bits).  
302 The Agilent Feature Extraction software (10.7.1.1) was used to extract the data following the  
303 appropriate GE protocol, and the data were further subjected to statistical analysis with

304 GeneSpring GX software (Agilent Technologies, Santa Clara, CA, USA). The gene expression  
305 data were scale normalized and  $\log_2$  transformed prior to the statistical analysis. Raw data  
306 from the comparative analysis of eggs of high and low quality can be accessed via the NCBI  
307 Gene Expression Omnibus [49] under the GSE167376 accession number [*the data will be made*  
308 *publicly accessible following publication; reviewers can access the data by using the following*  
309 *token: erkbmaaybjkjpob*].

310 For the analysis of the transcriptomic profile of n=8 samples of high-quality eggs, only  
311 the genes found to be expressed in at least 75% of the samples were used (the gold standard in  
312 microarray analysis). Differentially expressed genes (DEGs) between the groups representing  
313 high (HQ; n=5) and low (LQ, n=5) egg quality were identified with the use of Gene Spring GX  
314 software. The differences between the groups were analyzed by unpaired t-test according to the  
315 criteria of a minimum twofold change in expression and a p-value < 0.01. In this analysis, the  
316 Benjamini-Hochberg correction was applied. Average linkage clustering analysis (Gene Cluster  
317 3.0) was performed for the differentially abundant genes (unsupervised linkage).

318

### 319 *2.8. Mass spectrometry-based analysis of egg proteins*

320 Eggs were homogenized for 10 s using a homogenizer (Art-Micra D-8, Micra  
321 GmbH, Heitersheim, Germany) and by centrifugation at a speed of 23,500 rpm through  
322 QIAshredder devices (Qiagen, Hilden, Germany). Samples were then diluted 1:1 with 8 M  
323 urea/0.4 M  $\text{NH}_4\text{HCO}_3$ , and the protein concentrations were determined with a Bradford assay  
324 [50]. Prior to digestion, proteins were reduced for 30 min at 37°C using dithioerythritol at a  
325 final concentration of 5 mM and carbamidomethylated with iodoacetamide (final concentration  
326 15 mM) for 30 min at room temperature. Samples of 10  $\mu\text{g}$  total protein were digested for 4 h  
327 using 100 ng LysC (FUJIFILM Wako Pure Chemicals, Osaka, Japan). After dilution of the  
328 samples with water to 1 M urea, a second overnight digestion step using 200 ng modified

329 porcine trypsin (Promega, Madison, WI, USA) was performed at 37°C. One microgram of  
330 peptide was injected into an Ultimate 3000 RSLC chromatography system connected to a Q  
331 Exactive HF-X mass spectrometer (Thermo Scientific, Waltham, MA, USA). Samples were  
332 transferred to a PepMap 100 C18 trap column (100 µm x 2 cm, 5 µM particles, Thermo  
333 Scientific) at a flow rate of 5 µl/min using mobile phase A (0.1% formic acid and 1%  
334 acetonitrile in water). For separation, an EASY-Spray column (PepMap RSLC C18, 75 µm x  
335 50 cm, 2 µm particles, Thermo Scientific) at a flow rate of 250 nl/min was used. For the  
336 chromatography method, a two-step gradient from 3% mobile phase B (0.1% formic acid in  
337 acetonitrile) to 25% B in 160 min and from 25% to 40% B in 10 min was used. Spectra were  
338 acquired in the data-dependent mode with a maximum of 15 MS/MS spectra per survey scan.

339 For data analysis and label-free protein quantification, MaxQuant (v.1.6.1.0) [51] and  
340 the *Sander lucioperca* sequences in the NCBI database were used. During the analysis of the  
341 proteomic profile of high-quality eggs, only the proteins identified in at least 50% of the  
342 samples (i.e., in  $\geq 4$  out of 8 samples) were considered abundant and considered in the functional  
343 analysis (criteria suggested by Li et al. [52]). Statistical evaluation of the data from comparative  
344 analysis of high- and low-quality eggs was performed with Perseus V1.5.3.2. Between-group  
345 comparisons were performed with a t-test (followed by permutation-based FDR calculation at  
346 a significance level of 5%). The mass spectrometry proteomics data have been deposited in the  
347 ProteomeXchange Consortium via the PRIDE [53] partner repository with the dataset identifier  
348 PXD023229 [*the data will become freely accessible following publication; reviewers can*  
349 *access the data by logging in to PRIDE <https://www.ebi.ac.uk/pride/> with the following details:*  
350 *Username: reviewer\_pxd023229@ebi.ac.uk; Password: MEXVDYmg*]

351

352 *2.9. In silico, Gene Ontology and functional analysis of transcriptomic and proteomic data*  
353 *obtained during realization of objective no. 1*

354 For both transcriptome and proteome data, protein RefSeq accession numbers for each  
355 transcript and protein were obtained. Next, the RefSeq identifiers were indexed against 21,471  
356 human proteins in Swiss-Prot (downloaded from the UniProt database [uniprot.org] on 12  
357 October 2020) with Diamond v0.9.22, followed by alignment of the sequences using BLASTP  
358 with an e-value  $< 10 e^{-5}$ . The resulting file was filtered to keep only the best match for each  
359 protein. This enabled us to retrieve gene names and UniProt accession numbers for successfully  
360 aligned proteins, which were further used to perform Gene Ontology analysis.

361 Gene Ontology (GO) and KEGG pathway analyses were performed using the  
362 ShinyGO online platform [54] with biological processes considered as targets. Two separate  
363 analyses were performed, as presented in Supplementary file 1.

364 The first GO analysis (Supplementary file 1a) aimed at comparative analysis of the  
365 full transcriptome and proteome. To this end, each data set (transcriptome and proteome) was  
366 evaluated following the same analytical approach. First, the higher level GO categories were  
367 obtained (100 categories for each data set) and compared to each other for the occurrence of  
368 common and distinct GO categories. Next, enrichment analysis was performed to obtain 500  
369 significantly enriched (FDR  $< 0.05$ ) terms for each of the data sets. The obtained terms were  
370 further subjected to network analysis based on hierarchical clustering (related GO terms were  
371 linked together only when they shared overlap of at least 50% of genes). This allowed us to  
372 identify clusters (at least four different ontological terms joined together) characterized further  
373 with additional enrichment analysis of the gene list for each cluster, which enabled us to identify  
374 biological processes characteristic of each cluster.

375 The second GO analysis (Supplementary file 1b) was followed by the identification of  
376 transcriptome-specific, proteome-specific and conspecific subsets of genes, as revealed by a  
377 Venn diagram [55]. Each of the subsets was later analyzed with the ShinyGO platform in three  
378 steps:

- 379           - Step 1: Enrichment analysis (identification of the 30 most enriched processes with  
380           FDR < 0.05) was performed;
- 381           - Step 2: Hierarchical clustering was performed to identify separate clusters (sharing  
382           at least 30% of genes), with the condition that each cluster include at least three  
383           ontological terms;
- 384           - Step 3: Additional enrichment analysis of the genes constituting separate clusters  
385           was performed to find the 3 most enriched terms representative of each cluster.

386   Additionally, for each subset of genes, the 5 most enriched KEGG (<https://www.kegg.jp/>)  
387   pathways were identified.

388

389   *2.10. In silico, Gene Ontology and functional analysis of DEGs obtained from realization of*  
390   *objective no. 2*

391           For each DEG, a human homolog was obtained (as described in the previous section).  
392   Next, hierarchical clustering-based networking of the 30 most enriched (FDR < 0.05) biological  
393   processes was performed with the ShinyGO platform. GO terms were connected to each other  
394   only when they shared at least 50% of their genes. In this way, four different clusters connecting  
395   at least 3 different GO terms were identified. Next, the genes forming each cluster were once  
396   again subjected to GO enrichment analysis, enabling the identification of the 3 most enriched  
397   (FDR < 0.05) GO terms characterizing the analyzed DEGs. Additionally, all the DEGs were  
398   mapped to clusters of biological processes that were significantly enriched in the transcriptomic  
399   and proteomic profiles of high-quality eggs to determine their relevance in whole processes  
400   specific to either the transcriptome or proteome.

401

402   *2.11. Designation of candidate gene markers of egg quality in pikeperch during the*  
403   *realization of objective no. 2*



404 To identify the most suitable candidate gene markers to enable the prediction of egg  
405 quality in pikeperch, zebrafish gene identifiers for DEGs (identified during comparative  
406 analysis of high and low egg quality) were retrieved using ShinyGO. Next, the expression  
407 pattern (provided as the number of transcripts recorded per million reads; TPM) during  
408 zebrafish embryonic development for each gene was obtained from the Expression Atlas  
409 (<https://www.ebi.ac.uk/gxa/home>) based on the data published by White et al. [56]. Next, the  
410 data were grouped into 5 developmental periods (pre-ZGA, blastula/gastrula, somitogenesis,  
411 prim stage and 2-5 days post fertilization) identified by White et al. [56] as representative  
412 crucial developmental phases. For these periods, the mean expression value was calculated.  
413 Furthermore, the data were  $\log_2$  transformed and arranged in ascending order based on the pre-  
414 ZGA phase as the phase during which the maternal transcriptome plays a major role. The data  
415 were visualized as a heatmap with a color scale representing the normalized expression level  
416 using GraphPad Prism 9. As the most suitable candidate gene markers, 20 genes characterized  
417 with the highest expression during the pre-ZGA phase in zebrafish were considered and taken  
418 for qPCR validation.

419

#### 420 *2.12. qPCR validation of candidate gene markers of egg quality in pikeperch during the* 421 *realization of objective no. 2*

422 Total RNA obtained from eggs characterized by either high or low egg quality was  
423 subjected to reverse transcription (1.7 ng of total RNA) using a RevertAid First Strand cDNA  
424 Synthesis Kit (Cat. No. K1622, Thermo Fisher Scientific) according to the manufacturer's  
425 protocol. The protocol involved oligo(dT)<sub>18</sub> primers as well as an optional incubation step (5  
426 min at 65°C) aiming at the removal of secondary structures.

427 Real-time quantitative polymerase chain reaction (qPCR) was performed for each of  
428 the selected candidate genes using a Viia7 (Applied Biosystems) thermocycler. For each qPCR

429 (reaction volume 20  $\mu$ L), 10 ng cDNA template was used along with DyNAmo HS SYBR  
430 Green qPCR Master Mix (Cat. No. F410XL, Thermo Fisher Scientific) and 0.5  $\mu$ M forward  
431 and reverse primers (sequences of all the primers are provided in Supplementary file 2), which  
432 were designed with the Primer3Plus online platform [57]. The following cycling conditions  
433 were applied: enzyme activation for 10 min at 95°C followed by 40 cycles of denaturation at  
434 95°C for 15 s and annealing and elongation at 60°C for 1 min. After each amplification, melting  
435 curve analysis was performed to verify the amplification specificity and compare it with the  
436 predicted melting curve verified with uMELT [58]. In the analysis for each gene, a standard  
437 curve was calculated using a series of 6 twofold dilutions to determine reaction efficiency  
438 (reaction efficiencies between 85 and 110% were considered acceptable). Relative expression  
439 for each gene was normalized as the geometric mean of expression values recorded for 4  
440 reference genes, which were chosen on the basis of their stable expression levels and close-to-  
441 mean expression values in the microarray analysis [21]. Each reaction for qPCR validation was  
442 performed in duplicate. The data were compared between the groups (low and high egg quality)  
443 using a t-test (GraphPad Prism 9). Differences between groups were considered significant at p  
444 < 0.05.

445

### 446 **3. Results**

#### 447 *3.1. Scientific objective no. 1: Transcriptomic-proteomic characterization of eggs*

##### 448 *3.1.1. Transcriptomic profile of high-quality eggs*

449 Transcriptomic analysis revealed 10,238 expressed genes encoding unique proteins,  
450 including 9,465 proteins for which human homologs could be identified, encoded by 9,233  
451 genes, which were considered in further analysis. The 5 most highly expressed genes, based on  
452 the expression level in the microarray, were *hdgfl2*, *cldn4*, galactose-specific lectin nattoectin-

453 like (for which no human homolog was found) and *mt-nd5*. All the identified genes are  
454 presented in Supplementary file 3.

455

### 456 3.1.2. Proteomic profile of high-quality eggs

457 The proteomic analysis allowed us to identify 1450 proteins (Supplementary file 4), of  
458 which 806 could be detected in at least 50% of the samples and were considered abundant. The  
459 most abundant proteins were fish-specific vitellogenins and galactose-specific lectin nattoectin-  
460 like proteins. For 790 of these 806 abundant proteins, human homologs could be found, which  
461 corresponded to 699 unique proteins taken for further Gene Ontology analysis. The most  
462 abundant proteins in the eggs were found to be fish-specific proteins, such as various forms of  
463 vitellogenins, galactose-specific lectin nattoectin-like proteins and ladderlectin-like proteins.  
464 The proteins for which human homologs were found to be the most abundant were zona  
465 pellucida sperm-binding proteins 3 and 4 (encoded by *zp3* and *zp4*, respectively). All the  
466 proteins considered abundant are presented in Supplementary file 5.

467

### 468 3.1.3. Functional analysis of transcriptome and proteome datasets

469 The transcriptome and proteome datasets were each grouped into 100 higher level  
470 Gene Ontology biological process categories (Supplementary file 6). Among 94 conspecific  
471 categories, 10 were found to cover various processes linked to reproduction, 6 were related to  
472 development, and 12 were related to the immune system (Fig. 2). The remaining categories  
473 covered many important but very general biological processes related to, among others,  
474 methylation, cell function and maintenance, regulatory processes, protein processing and cell  
475 responses to various factors. Among the 6 proteome-specific terms, the acrosome reaction  
476 process included only two proteins: zona pellucida 3 and 4, which were among the most  
477 abundant proteins. Of the 6 transcriptome-specific higher level Gene Ontology terms identified,

478 three were found to comprise genes involved in various processes affecting behavioral features  
 479 (i.e., multiorganism behavior, regulation of behavior and intraspecies interaction between  
 480 organisms) (Supplementary file 6).

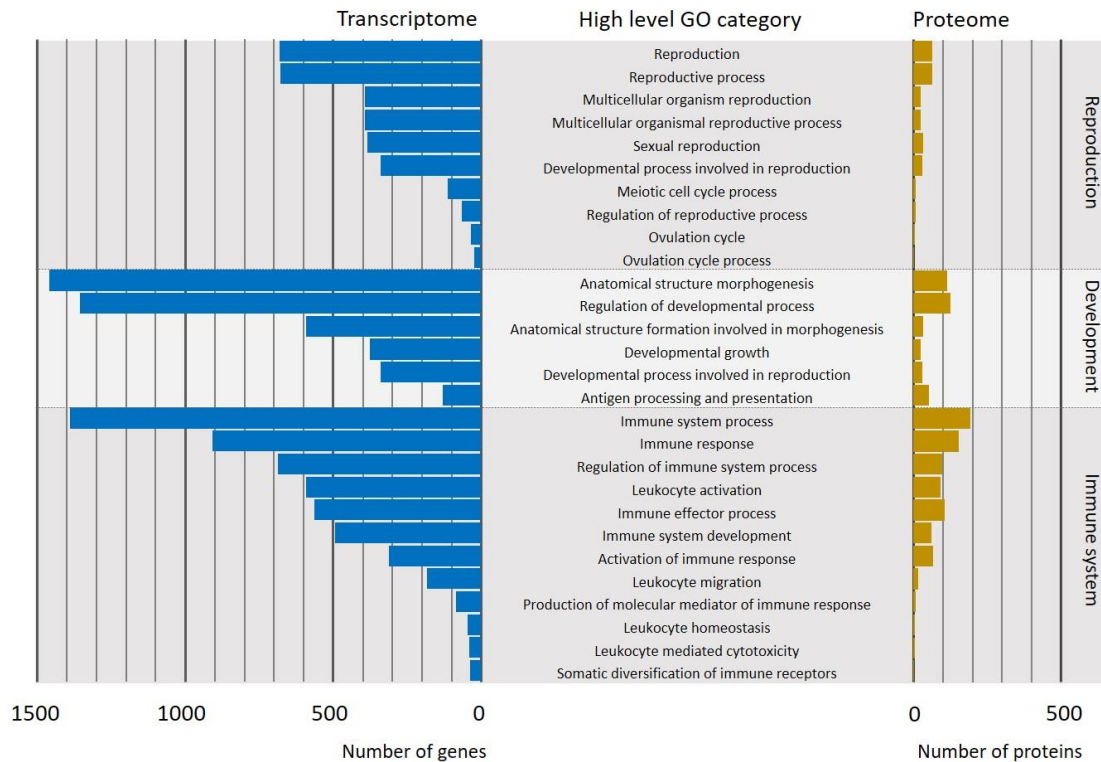

481  
 482 Fig. 2. Number of genes and proteins associated with higher level Gene Ontology (GO) categories related to  
 483 reproduction, development or immune system identified in the transcriptome and proteome of high-quality  
 484 pikeperch eggs (n=8). For further details, see also Supplementary file 6.  
 485

486 Enrichment analysis yielded the 500 most enriched GO terms for each dataset (i.e.,  
 487 transcriptome and proteome) (Supplementary file 7). Among the transcriptomes, the most  
 488 enriched (with  $FDR < 3.08e^{-09}$ ) processes were clustered into several groups taking part in,  
 489 among other functions, neurogenesis, mitosis, biosynthesis of molecules (including gene  
 490 expression), protein modification, intracellular signaling, cell metabolism, transport of  
 491 molecules and assembly of cellular components (Fig. 3).

492 The most enriched processes ( $FDR < 2.12e^{-05}$ ) identified on the basis of the proteome  
 493 were clustered into six distinguishable functional categories. These terms included translation,  
 494 catabolism of proteins and RNA, regulation of gene expression, immune response and

495 biogenesis of cellular components, and cellular metabolic process, with terms related to either  
496 metabolism or biosynthesis of purines being highly represented (14 terms) (Fig. 4).

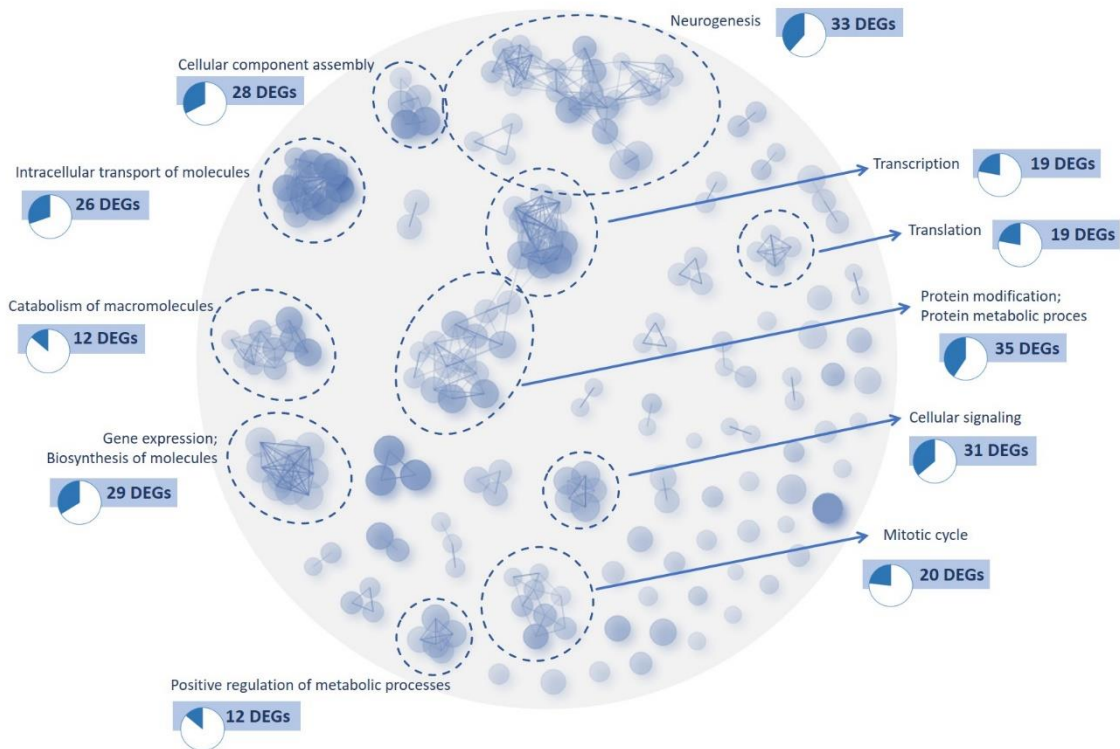

497

498 Fig. 3. Clustering of the 500 most enriched biological processes (BPs) obtained during the functional enrichment  
499 analysis (FDR<0.05) of all the genes identified in the transcriptome obtained from high-quality pikeperch eggs  
500 (n=8). For further details, see also Supplementary file 7. Circled clusters are those comprising at least four different  
501 BPs, for which additional functional analysis was performed to identify the main BP. Additionally, the number of  
502 differentially expressed genes (DEGs) identified between high- and low-quality eggs (for details see also  
503 Supplementary file 9) mapped to each of the main BPs were visualized.

504  
505

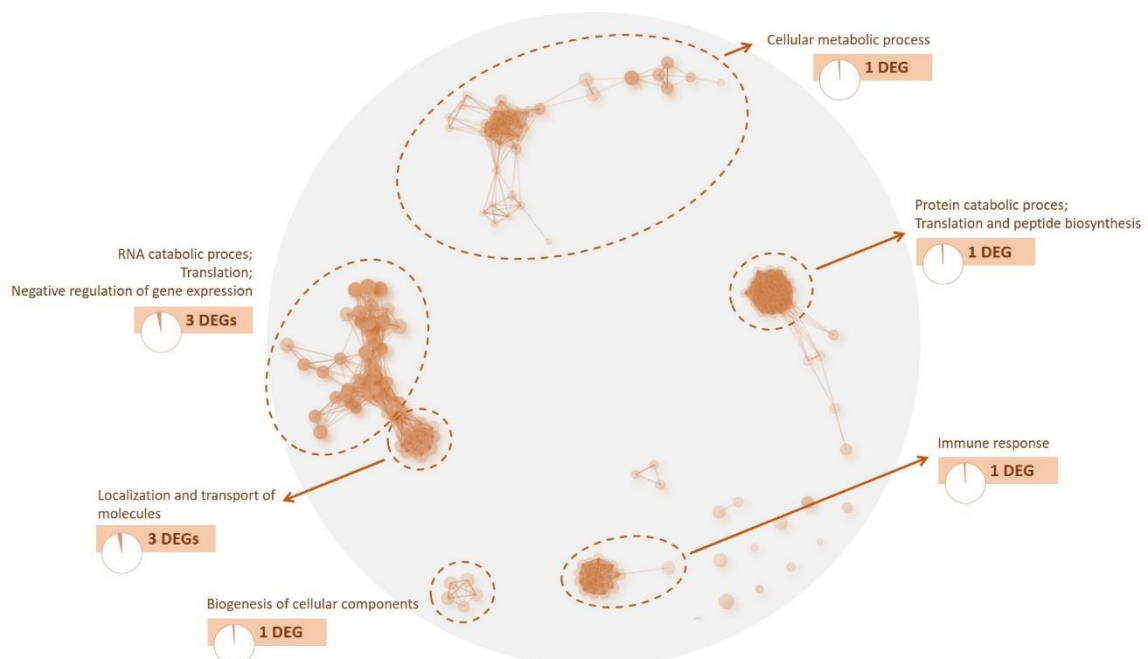

506

507 Fig. 4. Clustering of the 500 most enriched biological processes (BPs) obtained during the functional enrichment  
508 analysis (FDR<0.05) of all the proteins identified in the proteome obtained from high-quality pikeperch eggs  
509 (n=8). For further details, see also Supplementary file 7. Circled clusters are those comprising at least four different  
510 BPs, for which additional functional analysis was performed to identify the main BP. Additionally, the number of  
511 differentially expressed genes (DEGs) identified between high- and low-quality eggs (for further details, see also  
512 Supplementary file 9) mapped to each of the main BPs were visualized.  
513

#### 514 3.1.4. Functional analysis of genes specific to or shared between the transcriptome and 515 proteome

516 Among all the genes and proteins identified to be present in the high-quality eggs of  
517 pikeperch, 509 were found to be conspecific to both data sets. Among all the transcripts  
518 identified, 8,724 did not correspond to proteins in the proteome, and among all the proteins  
519 identified, 190 were not encoded by genes identified in the transcriptome (Fig. 5).

520

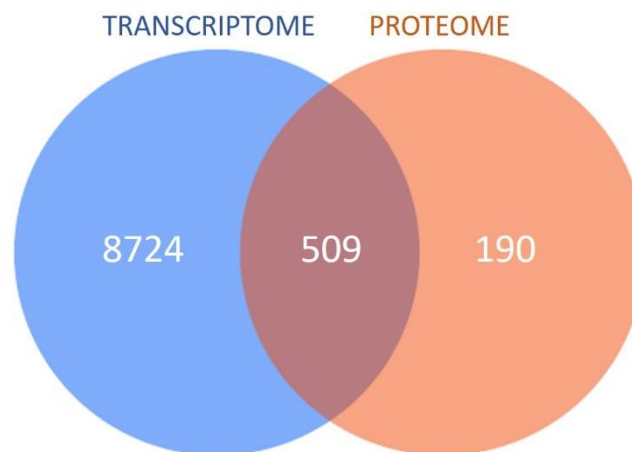

521

522 Fig. 5. Venn diagram showing the number of transcriptome-specific, proteome-specific and conspecific genes and  
523 associated proteins identified during the transcriptomic and proteomic profiling of high-quality pikeperch eggs  
524 (n=8).  
525

526 The set of transcriptome-specific genes could be organized into 5 Gene Ontology  
527 clusters (sharing at least 30% of genes) of the 30 most enriched biological processes, namely,  
528 neurogenesis, cellular component biogenesis, localization and transport of proteins, protein  
529 phosphorylation and transcription (Fig. 6a). KEGG pathway enrichment identified metabolic  
530 pathways, endocytosis and axon guidance, as the most enriched among the transcriptome-  
531 specific gene sets. In addition, it is noteworthy that protein processing in the endoplasmic

532 reticulum was found among the top 5 most enriched KEGG pathways (Fig. 6d). Detailed Gene  
533 Ontology analysis of the groups of genes constituting each cluster confirmed their relevance to  
534 the processes in which they were grouped. The gene sets constituting particular clusters  
535 appeared to be related to the endocytosis, axon guidance, focal adhesion and MAPK signaling  
536 KEGG pathways (Supplementary file 8).

537         Gene Ontology analysis of the proteins identified in pikeperch eggs revealed 4  
538 different clusters comprising 28 out of the 30 most enriched biological processes (Fig. 6b). The  
539 data set analyzed here contained hits related to the ribosome and proteasome among the top 5  
540 most enriched KEGG pathways. In addition, it should be highlighted that the proteome-specific  
541 gene set contained proteins related to metabolic pathways (similar to transcriptome-specific  
542 pathways) as well as protein modification activities, though oxidative phosphorylation appeared  
543 to be the primary pathway enriched (Fig. 6d). Furthermore, detailed Gene Ontology analysis of  
544 proteins constituting particular clusters indicated that the first two clusters were actually mostly  
545 related to translational processes. The proteins constituting the third cluster, comprising 13  
546 Gene Ontology terms, were found to be related to various catabolic processes, including  
547 catabolism of RNAs and proteins. Proteins identified in the fourth and final cluster were found  
548 to be involved in the biosynthesis of organonitrogen compounds, with the biosynthesis of  
549 amides presumed to be primarily targeted in this process. KEGG pathway analysis of the genes  
550 constituting different clusters showed that the proteome-specific gene set was mostly related to  
551 the ribosome pathway, regardless of the cluster analyzed. In addition, it should be highlighted  
552 that the proteasome was among the most enriched KEGG pathways (Supplementary file 8).

553         Functional analysis of the gene set shared between the transcriptome and proteome  
554 allowed us to distinguish four clusters in which 27 out of 30 most enriched Gene Ontology  
555 terms were grouped (Fig. 6c). The genes in this gene set were found to be involved in similar  
556 KEGG pathways to those identified for the proteome-specific pathway. This includes ribosome,

557 proteasome and metabolic pathways accompanied by carbon metabolism, among others (Fig.  
 558 6d). Specific functional analysis of the gene set constituting each of the Gene Ontology clusters  
 559 revealed similarities with the analysis of the proteome-specific set of genes. Two clusters of  
 560 genes were consistent and mainly involved in the translation process. The remaining clusters  
 561 comprised genes involved in catabolic processes and organonitrogen compound biosynthetic  
 562 processes. KEGG analysis revealed that in each cluster, the most enriched pathway was  
 563 ribosomes, followed by carbon metabolism (in three clusters), proteasomes (in two clusters)  
 564 and others, including RNA transport and metabolic pathways (Supplementary file 8).

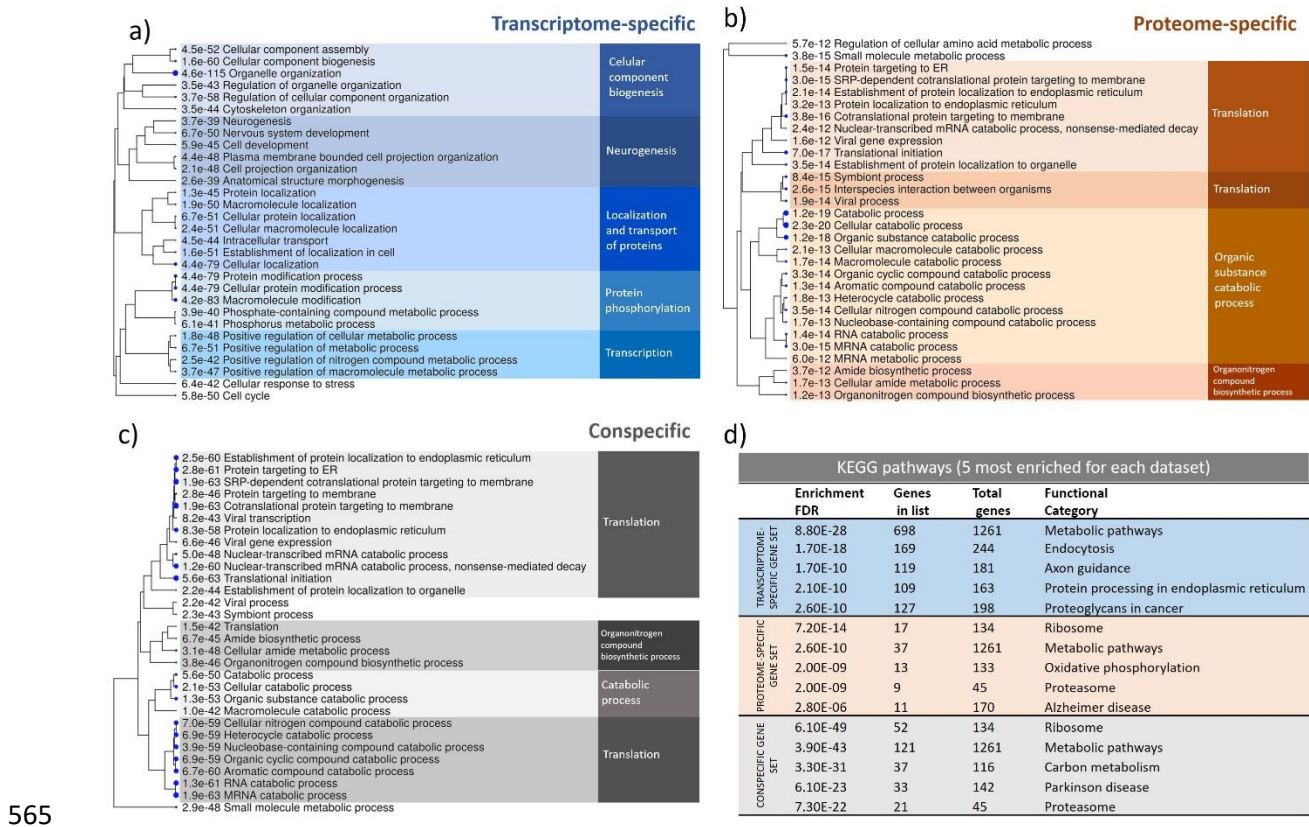

565  
 566 Fig. 6. Clustering analysis of the 30 most enriched (FDR<0.05) biological processes (BPs) for (a) transcriptome-specific  
 567  
 568  
 569  
 570  
 571  
 572

573 **3.2. Scientific objective no. 2: Transcriptomic-proteomic profiling of egg quality**

574 **3.2.1. Evaluation of egg quality**



575           Among the eggs exhibiting formation of the blastodiscs at the animal pole within 1 h  
576 post fertilization, two groups could be distinguished, i.e., eggs of high and low quality.  
577 Significant differences in embryonic survival could be detected at 72 h post fertilization (after  
578 ZGA). In the high-quality group, over 70% of larvae hatched, whereas in the low-quality group,  
579 less than 20% hatched. In both groups, less than 10% of hatched larvae were found to exhibit  
580 developmental deformities (Fig. 7).

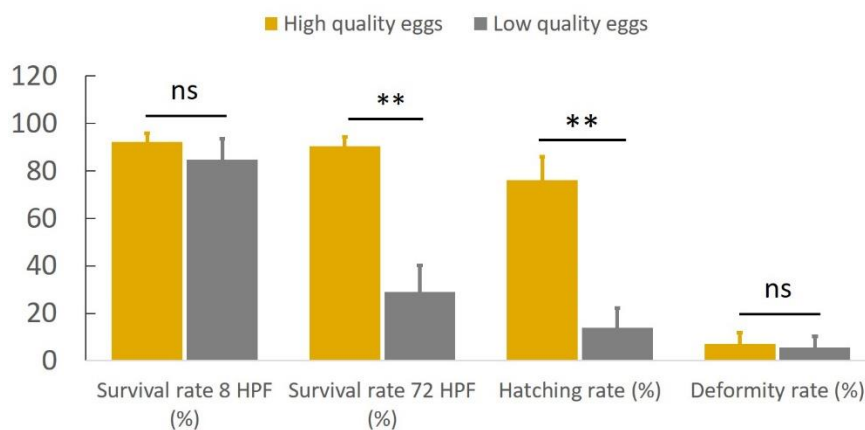

581  
582 Fig. 7. Results of evaluation of developmental competence of the preselected eggs assigned to high and low egg  
583 quality groups (n=5 for each group). ‘HPF’ stands for ‘hours post fertilization’; ‘ns’ stands for ‘nonsignificant’  
584 (highlighting that no significant differences were detected;  $P>0.05$ ). Double asterisks indicate that the data between  
585 the groups were significantly different ( $P<0.01$ ).  
586

### 587 3.2.2. Transcriptomic analysis of high- and low-quality eggs

588           Within the comparative analysis of the transcriptomes of high- and low-quality eggs,  
589 successful hybridization was recorded for 17,243 probes. Statistical analysis revealed 84  
590 differentially expressed genes (DEGs) ( $FDR<0.01$  with at least a 2-fold change) (Fig. 8a,  
591 Supplementary file 9). Only 2 DEGs were found to be downregulated in high-quality eggs  
592 (*ctnn2b*, *msn*), and the remaining 83 DEGs were downregulated in low-quality eggs. Gene  
593 Ontology analysis revealed four different clusters (with at least 3 terms and sharing at least 50%  
594 of genes) that were found to be related to RNA splicing (two clusters), chromosome  
595 organization and cell junction organization. The most enriched term – organelle organization,  
596 associated with 31 DEGs – was not connected to any cluster (Fig. 8b).

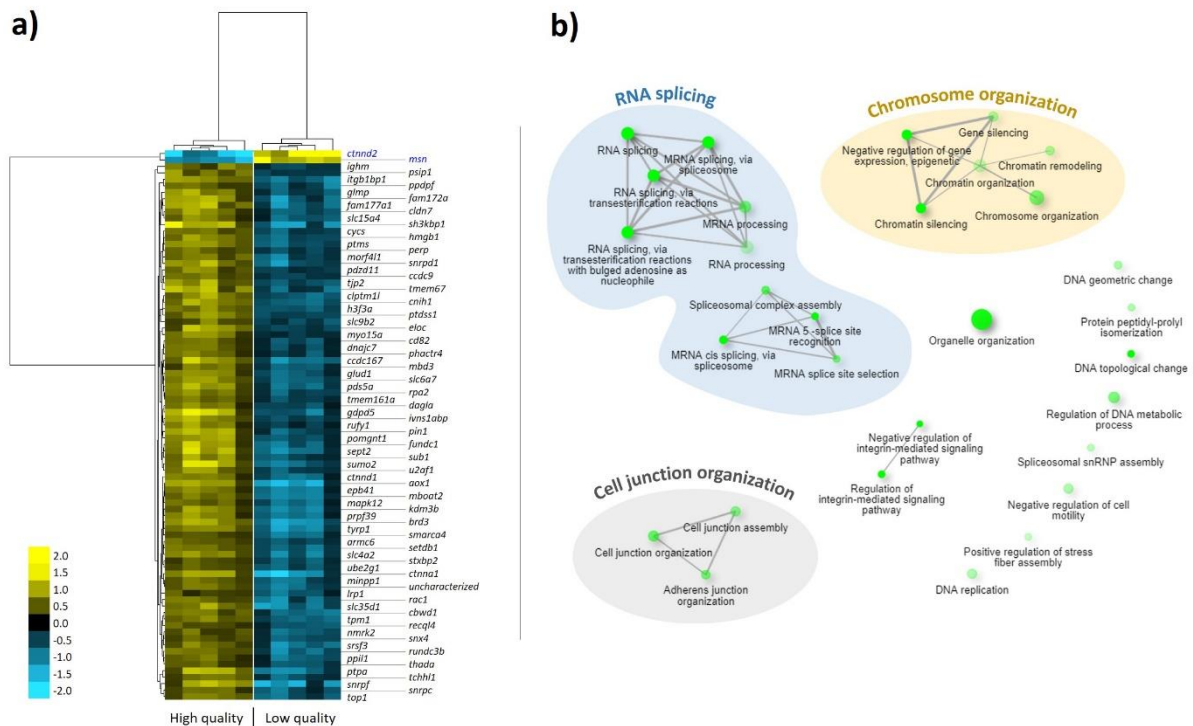

597

598 Fig. 8. Panel 'a': Unsupervised average linkage clustering of 85 differentially expressed genes (DEGs) between  
 599 high- and low-quality pikeperch eggs (n=5 for each group). Each row represents the same gene, whereas each  
 600 column represents an RNA sample obtained from a batch of freshly ovulated eggs. The expression level for each  
 601 gene is presented using a color intensity scale, where yellow and blue represent over- and under-expression,  
 602 respectively. Black represents the median gene abundance. Panel 'b': Clustering analysis of the 30 most enriched  
 603 ontological terms (darker nodes are more significantly enriched gene sets; larger nodes represent larger gene sets;  
 604 thicker edges represent more overlapping genes). Genes in clusters highlighted with different colors were  
 605 additionally verified to be involved in RNA splicing, chromosome organization and cell junction organization in  
 606 a separate analysis.

607

608 By analyzing the expression levels of DEGs during the embryonic development of  
 609 zebrafish, it was found that the expression levels of only 34 DEGs increased after ZGA. The  
 610 remaining 47 DEGs were characterized by lower expression following ZGA (Fig. 9). qPCR  
 611 validation of the 20 DEGs characterized by the highest expression before ZGA in zebrafish  
 612 confirmed a significant difference (t-test,  $p < 0.05$ ) for 85% of them (Fig. 10).

613

### 614 3.2.3. Proteomic analysis of high- and low-quality eggs

615 Proteomic analysis of eggs of different quality enabled the identification of 946  
 616 proteins. Statistical analysis did not reveal any proteins with significantly different abundance  
 617 between high- and low-quality eggs (FDR > 0.05).

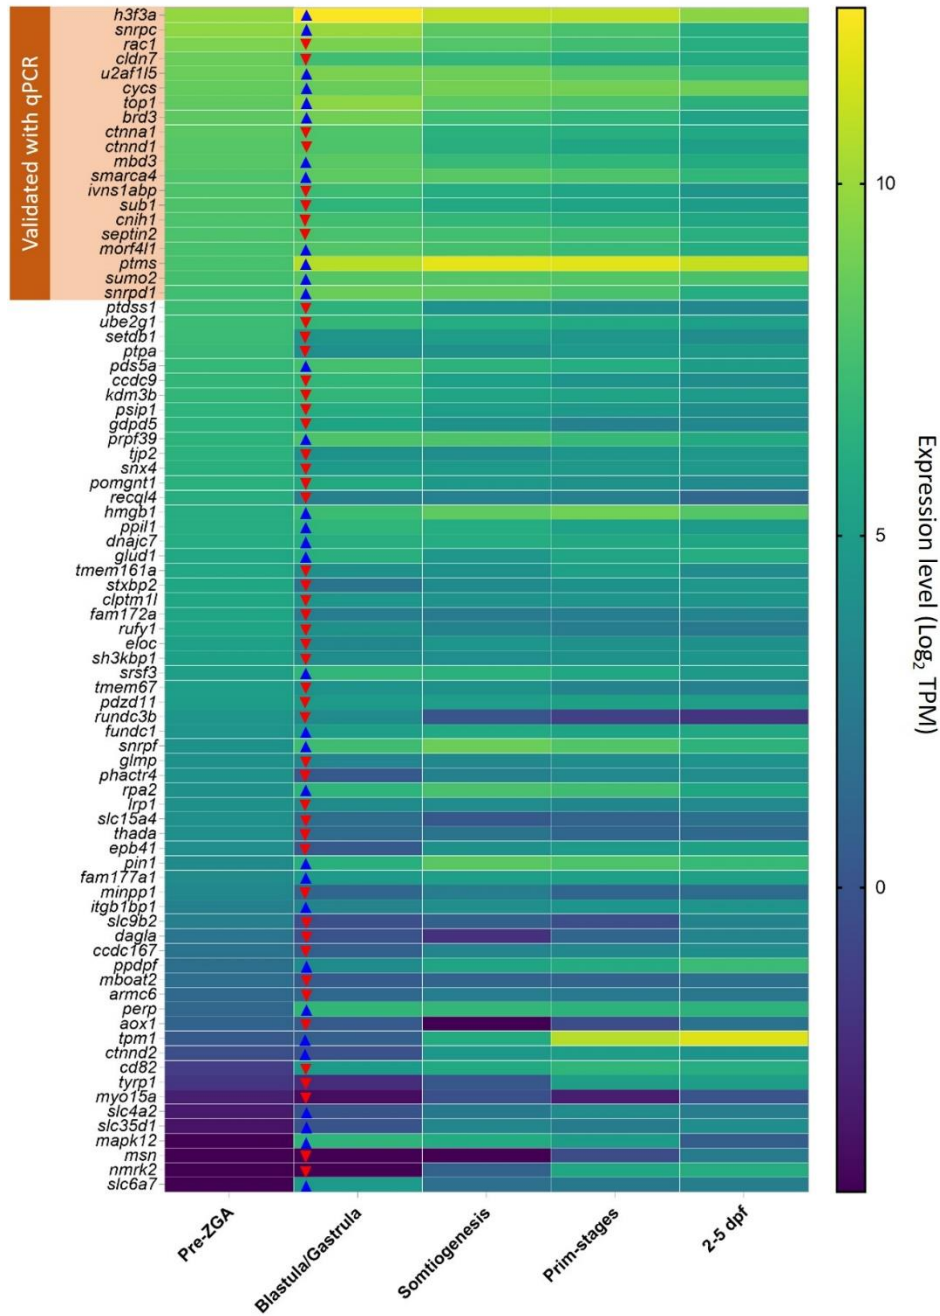

618

619 Fig. 9. Heat map presenting the expression levels of differentially expressed genes identified during comparative  
 620 transcriptomic analysis of high- and low-quality pikeperch eggs during zebrafish embryonic and larval  
 621 development (based on data from White et al. 2017). Genes are arranged from top to bottom in descending order  
 622 of the expression level based on the data provided in the first column (pre-ZGA; period before zygotic genome  
 623 activation [ZGA]). Blue (up) and red (down) arrowheads provided on the blastula/gastrula stage column indicate  
 624 up- and downregulation of particular genes following ZGA, respectively. TPM – number of transcripts per million  
 625 reads, dpf – days post fertilization (2-5 dpf refers to the post hatching period). The first 20 genes (exhibiting the  
 626 highest expression in the pre-ZGA period in zebrafish), highlighted and labeled in the upper-left corner, were  
 627 subjected to qPCR validation of their expression level in pikeperch eggs (of various quality).

628

629

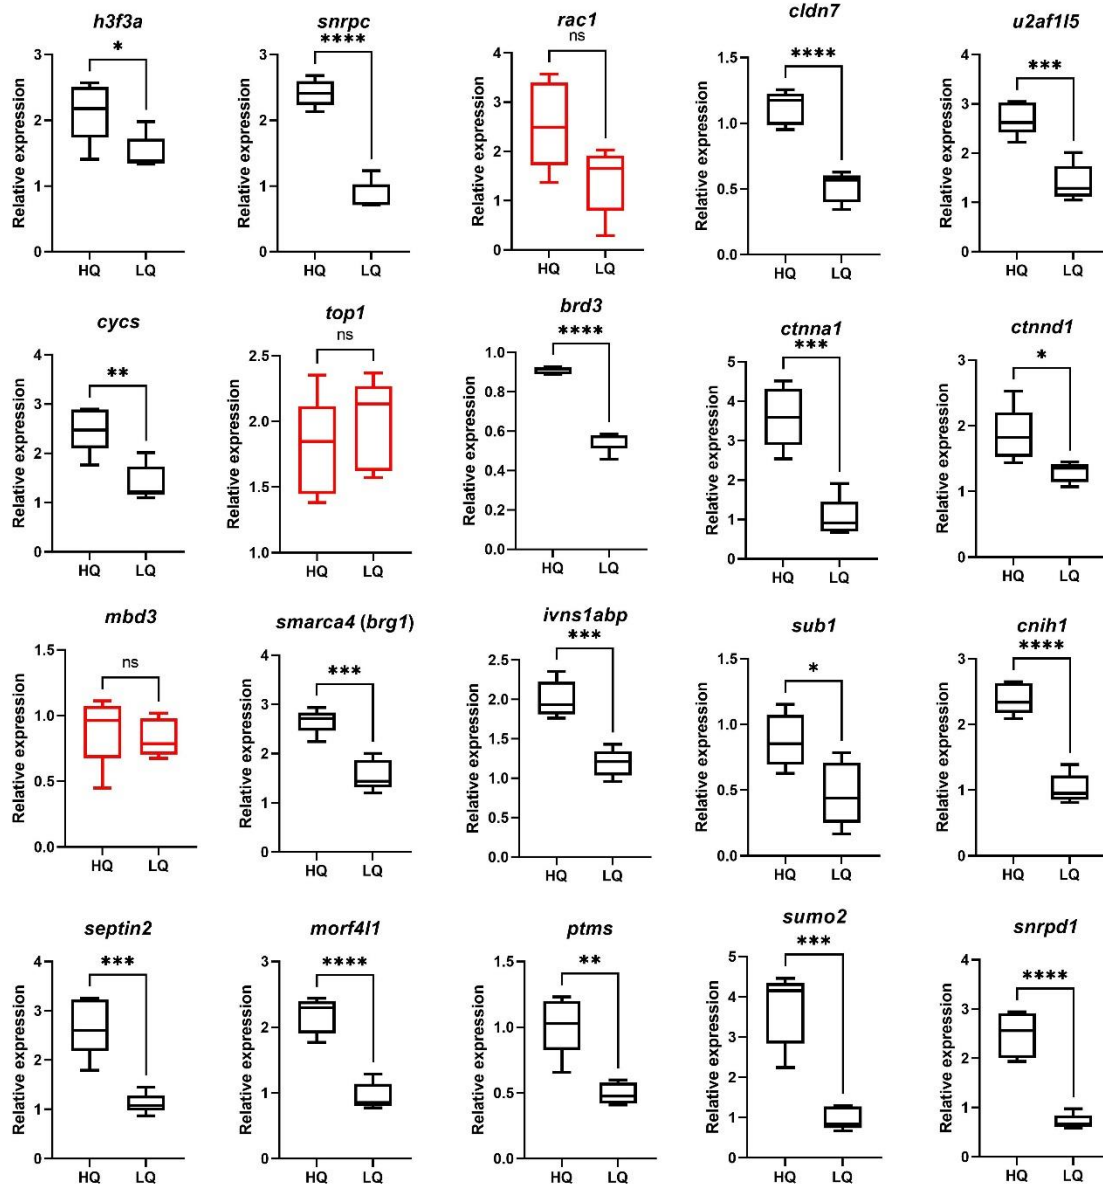

630

631 Fig. 10. Results of validation of candidate genes (differentially expressed between high and low egg quality in  
 632 pikeperch; n=5 for each group) with qPCR. Boxes represent the upper and lower quartiles, with the median value  
 633 represented by the horizontal bar inside the box. Whiskers represent the minimum and maximum values recorded.  
 634 The results of statistical analysis are presented as follows: ns – nonsignificant, \* – P<0.05, \*\* – P<0.01, \*\*\* –  
 635 P<0.001, \*\*\*\* – P<0.0001.

636

637

638

#### 4. Discussion

639 4.1. Scientific objective no. 1.

640 4.1.1. Molecular profile of high-quality eggs

641 Our study provides novel insights into the understanding of the role of maternally-

642 derived molecular cargo in fish. The two data sets contributed similarly to the highest level GO

643 profile (Fig. 2). Both groups were associated with many processes that are critical for  
644 reproduction, development and the immune system. The same processes, while being very  
645 general, were already reported to be important components of the developmental competence  
646 of eggs in finfishes [17,21,59]. However, one unique feature of the transcriptome in this analysis  
647 that sheds light on the regulation of behavior should be mentioned. In a recent study, Źarski et  
648 al. (2020) indicated that genes involved in neurogenesis are highly modulated by domestication  
649 levels in the eggs of pikeperch. This suggests that the predetermination of nervous system  
650 development by maternally-inherited mRNAs should receive more attention. In particular,  
651 maternally-inherited mRNAs would shape embryo neurodevelopment and possibly the future  
652 behavior of the fish [60]. In contrast, in regard to proteomic-specific high level GO categories,  
653 the acrosome reaction category attracts attention, as it is well known that spermatozoa of teleost  
654 fishes have no acrosome [61]. This category included zona pellucida proteins, which are  
655 important components of egg envelopes that play various roles during oogenesis, fertilization  
656 and embryonic development [62]. It is worth mentioning that various forms of zona pellucida  
657 proteins were identified in the pikeperch egg proteome (Supplementary file 4), confirming their  
658 importance in the cells analyzed.

659 Further analysis shows, for the first time, that transcripts and proteins have distinct,  
660 yet complementary, functions in the egg of teleost fish. The clustering analysis of most enriched  
661 GO terms indicates certain unique functionalities for each of the two data sets analyzed. It  
662 should be highlighted that among the specific GO terms, those involved in neurogenesis were  
663 characteristic of the transcriptome (Fig. 3, Supplementary file 7). On the other hand, high  
664 representation of molecules responsible for the immune response could be identified as  
665 characteristically enriched in the proteome and was not found in the top 500 enriched processes  
666 for the transcriptome data set (Supplementary file 4). Obviously, immune response genes are  
667 important mRNAs identified in eggs of percids [63] and in pikeperch (Supplementary file 3).

668 However, given that translation is quiescent, it seems to be more likely that the proteins already  
669 present in the egg play a main role in the defense against pathogens in eggs and early embryos.  
670 Considering that several important immune response translation proteins are among the most  
671 abundant proteins (next to vitellogenins and zona pellucida proteins), including galactose-  
672 specific lectin natectin-like proteins [64], it is clear that defense against pathogens is among  
673 the priorities for fish eggs. It was previously suggested that immune response-dependent protein  
674 profile in eggs can be modulated by the rearing environment in which females are kept [48].  
675 Therefore, it should be highlighted that health and welfare status of broodfish before FOM,  
676 during which the majority of proteins are deposited [12], may affect the capacity of the eggs  
677 and developing embryo to tackle the pathogens. However, the role of the transcriptome in  
678 defense mechanisms should not be neglected, because genes encoding immune response  
679 proteins are also present in the egg at very high levels, including the galactose-specific lectin  
680 natectin protein (third most expressed gene). This indicates that this protein may play a crucial  
681 role throughout embryogenesis as a first line of immune defense. However, further, more  
682 dedicated study of this issue is required to draw valid conclusions.

683

#### 684 *4.1.2. Role of transcriptome-specific, protein-specific and conspecific molecules*

685 Molecular profiling revealed characteristic features of the transcriptome-specific  
686 subset of genes. The mRNA contained in the oocyte was found to be considerably enriched in  
687 processes related to transcription, protein phosphorylation, biogenesis of cellular compounds  
688 and localization and transport of the proteins. This highlights that maternally-inherited  
689 transcriptomic cargo plays a crucial role in the intracellular ‘management’ of the proteins  
690 produced but is also responsible for gene expression (features also recorded at the level of the  
691 whole transcriptome; see Fig. 3). However, the most unique characteristics were associated with  
692 the genes involved in neurogenesis; this was additionally confirmed by KEGG pathway

693 enrichment analysis, which identified axon guidance as among the most enriched pathways (for  
694 details see Supplementary file 8). It should be emphasized that axon guidance was already  
695 reported to be modified by the domestication process in pikeperch eggs [47]. Therefore, our  
696 study clearly indicates that development of the nervous system is a characteristic ‘maternal  
697 legacy’ in the ovulated egg and possibly in the developing embryo as well. This again brings  
698 attention to behavioral traits as factors conditioning adaptability of the fish to particular habitats  
699 and/or culture conditions.

700           Functional analysis of proteome-specific and conspecific subsets of data for the two  
701 types of molecules indicates the high importance of translation under the control of both types  
702 of molecules. This is in accordance with previous reports indicating that translation is among  
703 the crucial processes conditioning developmental competence in fishes [1,21], similar to the  
704 case in other animals [18]. In addition, clustering revealed the importance of protein and nucleic  
705 acid catabolism as well as organonitrogen compound biosynthesis, for which the cell is prepared  
706 at both the transcriptomic and proteomic levels. Interestingly, the KEGG pathway enrichment  
707 analysis highlights, along with metabolism or oxidative phosphorylation, two major elements:  
708 the ribosome and the proteasome (see also Supplementary file 8). This additionally confirms  
709 the very great importance of intracellular biosynthesis of proteins and their degradation,  
710 suggesting extensive remodeling within the eggs. Źarski et al. [21] reported that genes involved  
711 in ubiquitination (intracellular protein degradation) are crucial for the developing embryo.  
712 Additionally, Chapman et al. [23] reported that the expression level of ubiquitin-related genes  
713 in ovaries was related to developmental competence of eggs in striped bass (*Morone saxatilis*).  
714 Our study confirms that the potential for translation and degradation of proteins and nucleic  
715 acids is among the most important features of ovulated fish eggs.

716

717 *4.2.Scientific objective no. 2*

718     4.2.1. *Molecular profiling of egg quality*

719             Egg quality recorded during the controlled reproduction of pikeperch is usually highly  
720 variable [35,38]. In fish, such variability is derived from both unfertilizable eggs (e.g.,  
721 overripened eggs) and eggs that are competent for fertilization but die during the early stages  
722 of embryonic development [17]. The latter phenomenon, still barely studied in fish, could be  
723 considered in our study thanks to the specific preselection procedure applied (Fig. 1). This  
724 allowed us to find, for the first time in percids, that such early embryonic lethality significantly  
725 contributes to the overall egg quality. However, it should be noted that the eggs exhibiting high  
726 early embryo lethality did not contribute to an observed increase in the incidence of larval  
727 deformity, which is a growing and serious concern in percids [46]. Therefore, the eggs  
728 preselected for molecular analysis in our study were characterized by high fertilization capacity  
729 but different developmental potential following fertilization. Thus, we were able to focus on  
730 the molecular profile being predictive of altered ‘machinery’ leading to developmental failure  
731 at early stages, which was done for the first time with such complex molecular profiling.

732             Among the two types of molecules investigated in our study, only the transcriptomic  
733 profile was found to be predictive of egg quality, whereas proteomic profiling did not reveal  
734 any significant differences between high- and low-quality eggs. This is in contrast to other  
735 studies revealing differentially abundant proteins in eggs of different quality. For example, in  
736 Eurasian perch [26] and in zebrafish [25], respectively, tens and hundreds of differentially  
737 abundant egg-quality-dependent proteins were detected. Such discrepancies between the  
738 published studies and the data obtained in our study may arise for various reasons. In the case  
739 of Eurasian perch reported by Castets et al. [26], it can be presumed that the sampling strategy,  
740 without any preselection, could affect the overall proteomic profile observed. However, in the  
741 case of zebrafish, almost all the eggs analyzed developed to the approximately 256-cell stage,  
742 indicating that embryonic development failed after successful fertilization. However, the main



743 reason for the discrepancies observed could be associated with the different proteomic  
744 approaches that were used. In the study of Yilmaz et al. [25], proteomic profiling was performed  
745 after initial molecular weight-based fractionation of the proteins, which increased the number  
746 of quantified proteins. However, in the case of zebrafish, highly abundant proteins (such as  
747 vitellogenins, zona pellucida proteins or ribosomal proteins) were also found to be differentially  
748 abundant between high- and low-quality eggs. Therefore, it could be assumed that our  
749 straightforward LC-MS/MS approach without prefractionation allowed us to identify egg-  
750 quality-related proteins and should detect protein-dependent processes affecting egg quality. Of  
751 course, the discrepancies in overall findings between the studies may also be explained by  
752 species-specific factors and egg characteristics. Species specificities in the molecular profile of  
753 eggs have also been evidenced at the transcriptome level in a comparative analysis of cod and  
754 trout eggs [65]. Nevertheless, it is clear that we did not find strong egg quality-dependent  
755 proteome alterations in pikeperch, which could also be related to the applied preselection  
756 procedure. This may suggest that early embryo lethality in this species is determined after the  
757 generation of the protein reservoir in the egg (ending before the start of the FOM process; [12]),  
758 which highlights the fact that processes occurring during the FOM are strong modulators of egg  
759 quality. This finding is in agreement with a recent study suggesting that the processes directly  
760 preceding ovulation, and not those occurring during oogenesis, are the main modulators of egg  
761 quality [17]. However, to draw final conclusions, more detailed research is still needed.

762

#### 763 4.2.2. Candidate markers of egg quality

764 Among 85 DEGs identified to be predictive of early embryo lethality in our study,  
765 only 2 (*ctnnd2* and *msn*) were downregulated in high-quality eggs, whereas the remaining genes  
766 were downregulated in low-quality eggs (Fig. 8). The identified DEGs were found to be  
767 enriched in organelle organization, RNA splicing, chromosome organization and cell junction

768 organization. Interestingly, none of these ontology terms have been previously reported to be  
769 clearly related to egg quality in teleosts. However, when mapping these DEGs to the processes  
770 enriched in the whole transcriptome (see Fig. 3) and proteome (Fig. 4), it becomes apparent that  
771 this set of genes plays multiple roles in the cell, including in protein modification, transcription,  
772 and translation and in cellular signaling, which were previously reported to have egg-quality-  
773 modulatory effects in other species [17,21,24,59,66]. Interestingly, a high number of DEGs (33)  
774 were also found to play a role in neurogenesis, representing the first time that egg quality  
775 markers have been linked with this important biological process. These observations highlight  
776 the added value of the combined ontological analysis (typical enrichment analysis and global  
777 overview of the whole transcriptome) implemented here, as it provides new insights into the  
778 roles of DEGs in the developmental competence of pikeperch eggs and in our study draws  
779 attention to the multifunctionality of the gene set. Moreover, it highlights particular genes as  
780 modulators of developmental competence rather than involved solely in the processes for which  
781 this gene set is enriched. From this point of view, our study provides novel insights into the  
782 processes determining egg quality.

783         A comparison of published data with the set of DEGs identified in the present study  
784 indicates the uniqueness of the data obtained since none of the candidate genes obtained for  
785 pikeperch was reported to be quality-dependent in various fish species [1,17,21,22,67,68].  
786 Therefore, we examined at the expression profile of all the DEGs during embryogenesis in  
787 zebrafish based on data published by White et al. [56]. This allowed us to find that not all the  
788 genes were expressed at the zygote stage in zebrafish, despite being relatively well expressed  
789 in pikeperch eggs (see Supplementary file 3). This includes *slc4a2*, *slc35d1*, *mapk12*, *msn*,  
790 *nmrk2* and *slc6a7* (Fig. 8). This analysis reveals that the maternal transcriptomic cargo  
791 contained in the eggs may vary among species. A similar conclusion was drawn by Myers et al.  
792 [69], who reported that genes constituting quality markers in other species (as reported by

793 Sullivan et al. [66]) were also poorly expressed or not at all expressed in ovulated eggs of hybrid  
794 catfish until neurulation. Interspecies differences in transcript abundance in eggs between cod  
795 and rainbow trout were also reported by Wargelius et al. [65]. This pattern highlights that the  
796 interspecies comparison of the molecular markers related to egg quality may suffer from very  
797 large biases. It also allows us to suggest that the molecular mechanisms driving early  
798 embryogenesis may also vary across species. However, this needs to be studied in greater detail,  
799 with similar analytical workflows for data collection (laboratory techniques, bioinformatics,  
800 etc.) to draw valid conclusions. Nevertheless, our study is the first to provide a set of molecular  
801 markers of early embryo lethality in pikeperch, which can be a valuable tool in further studies  
802 on the developmental competence of eggs in this important fish species.

803 The selection of candidate genes based on expression patterns during zebrafish  
804 embryonic development led to the identification of 20 genes that are crucial for embryonic  
805 development (Fig. 9). Importantly, 17 of them (85%) were successfully validated with qPCR,  
806 providing a set of solid candidate quality markers crucial for development in fish and other  
807 animals. For example, *h3f3a* was found to be an essential maternal factor for successful oocyte  
808 reprogramming in mice [70], and *snrpc* was previously reported to play a crucial role during  
809 amphibian and fish development [71]; *cldn7* was responsible for maintaining blastocyst  
810 development in pigs [72], whereas *ctnnal* was reported to be important for the development of  
811 the heart during mammalian embryogenesis [73]. Moreover, *ctnnd1* expression, which is  
812 dependent on the level of luteinizing hormone, was found to be crucial during maturation in  
813 human oocytes [74], suggesting that this gene could be a valuable marker of not only egg quality  
814 but also FOM progression. Another gene, *smarca4* (also known as *brg1*), was reported to  
815 regulate ZGA in the mouse [75], which makes it a highly promising candidate gene for  
816 monitoring early embryonic lethality stemming from failure during ZGA in fishes. Several  
817 identified genes are important in mammals for processes related to the progression of oogenesis

818 (*sub1*; [76]), oocyte development (*sumo2*; [77]) and meiosis (*septin2*; [78]), further highlighting  
819 the possibility of using these markers in developmental studies in fishes. In the case of the  
820 remaining positively validated transcripts, such as *u2af115*, *cycs*, *brd3*, *ivns1abp*, *cnih1*, *morf411*  
821 and *ptms*, their involvement in early embryogenesis remains to be explored in fishes and other  
822 animals, as they likely constitute a valuable set of candidate genes.

823

#### 824 4.3. Conclusions

825 Our study provides novel insight into the role of maternally-inherited molecular cargo  
826 in finfishes. The approach taken in our study sheds light on the importance of the transcriptome  
827 in the development of the nervous system, which confirms the role of neurogenesis-related  
828 mRNAs as very important nongenetic heritable factors [7,79]. On the other hand, proteomic  
829 analysis highlights the crucial and specific role of proteins in the immune response in ovulated  
830 eggs. Additionally, integrated transcriptomic-proteomic analysis draws attention to the  
831 galactose-specific lectin natectin gene and protein as the frontline defense molecule for the egg  
832 and – most likely – the developing embryo.

833 The molecular analysis of egg developmental competence emphasizes postvitellogenic  
834 processes (FOM and ovulation) as those compromising the transcriptomic profile but not  
835 affecting proteomic cargo. This brings attention to the need for careful reconsideration of the  
836 prespawning conditions that the fish are exposed to and reproductive protocols (previously  
837 reported to affect egg quality [38] as well as transcriptomic profile [22]) as very strong  
838 modulators of egg quality and their molecular structure. Although the mechanisms driving these  
839 alterations and the consequences stemming from the differential abundance of the transcripts  
840 remain to be explored, the candidate quality markers provided in this study are the first to be  
841 identified in pikeperch and represent valuable resources for further studies on the reproductive  
842 biology of this and other fish species. All of these results are of major importance for

843 understanding the influence of external factors on reproductive fitness in both captive and wild-  
844 type fish species.

845

846

## 847 **5. Acknowledgements**

848 The authors are sincerely grateful to ASIALOR fish farm for their support and access  
849 to their facilities as well as Jean Babtiste Muliloto, Miroslav Blecha and Maud Alix for their  
850 assistance during the reproduction of pikeperch.

851

## 852 **6. Funding**

853 This work was supported by the National Science Center for Poland (NCN) [grant number  
854 2016/22/M/NZ9/00590].

855

## 856 **7. Data availability statement**

857 Raw data from the comparative analysis of eggs of high and low quality can be accessed via  
858 the NCBI Gene Expression Omnibus under the GSE167376 accession number [*the data will be*  
859 *made publicly accessible following publication*].

860 The mass spectrometry proteomics data have been deposited in the ProteomeXchange  
861 Consortium via the PRIDE partner repository with the dataset identifier PXD023229 [*the data*  
862 *will become freely accessible following publication*].

863

## 864 **8. Competing interest**

865 None of the authors have any competing interests.

866

867 **9. Contribution of the authors**

868 **Daniel Źarski:** conceptualization, methodology, investigation, validation, formal analysis,

869 visualization, supervision, project administration, funding acquisition, writing – original draft

870 **Aurelie Le-Cam:** validation, formal analysis

871 **Thomas Frohlich:** validation, formal analysis

872 **Miwako Kösters:** investigation

873 **Joanna Nynca:** investigation

874 **Chrostophe Klopp:** data curation

875 **Sławomir Ciesielski:** investigation

876 **Beata Sarosiek:** investigation

877 **Katarzyna Dryl:** investigation

878 **Jerome Montfort:** data curation, validation

879 **Jarosław Król:** investigation

880 **Pascal Fontaine:** resources, supervision

881 **Andrzej Ciereszko:** funding acquisition, supervision

882 **Julien Bobe:** conceptualization, methodology, supervision

883

884 **10. References**

885 [1] C.T. Cheung, T.V. Nguyen, A. le Cam, A. Patinote, L. Journot, C. Reynes, J. Bobe, What makes a  
886 bad egg? Egg transcriptome reveals dysregulation of translational machinery and novel  
887 fertility genes important for fertilization, *BMC Genomics*. 20 (2019) 1–14.  
888 <https://doi.org/10.1186/s12864-019-5930-8>.

889 [2] W. Tadros, H.D. Lipshitz, The maternal-to-zygotic transition: a play in two acts, *Development*.  
890 136 (2009) 3033–3042. <https://doi.org/10.1242/dev.033183>.

891 [3] K. Zhang, G.W. Smith, Maternal control of early embryogenesis in mammals, *Reproduction,*  
892 *Fertility and Development*. 27 (2015) 880–896. <https://doi.org/10.1071/RD14441>.

- 893 [4] F. Ren, Q. Lin, G. Gong, X. Du, H. Dan, W. Qin, R. Miao, Y. Xiong, R. Xiao, X. Li, J.-F. Gui, J. Mei,  
894 Igf2bp3 maintains maternal RNA stability and ensures early embryo development in zebrafish,  
895 *Communications Biology*. 3 (2020) 94. <https://doi.org/10.1038/s42003-020-0827-2>.
- 896 [5] Z. Alizadeh, S.-I. Kageyama, F. Aoki, Degradation of maternal mRNA in mouse embryos:  
897 Selective degradation of specific mRNAs after fertilization, *Molecular Reproduction and*  
898 *Development*. 72 (2005) 281–290. <https://doi.org/10.1002/mrd.20340>.
- 899 [6] D.S. Wagner, R. Dosch, K.A. Mintzer, G. Runke, A.P. Wiemelt, M.C. Mullins, Maternal Control  
900 of Vertebrate Development before the Midblastula Transition, *Developmental Cell*. 6 (2004)  
901 771–780. <https://doi.org/10.1016/j.devcel.2004.05.002>.
- 902 [7] I. Adrian-Kalchhauser, J.-C.C. Walsler, M. Schwaiger, P. Burkhardt-Holm, RNA sequencing of  
903 early round goby embryos reveals that maternal experiences can shape the maternal RNA  
904 contribution in a wild vertebrate, *BMC Evolutionary Biology*. 18 (2018) 34.  
905 <https://doi.org/10.1186/s12862-018-1132-2>.
- 906 [8] S. Israel, M. Ernst, O.E. Psathaki, H.C.A. Drexler, E. Casser, Y. Suzuki, W. Makalowski, M.  
907 Boiani, G. Fuellen, L. Taher, An integrated genome-wide multi-omics analysis of gene  
908 expression dynamics in the preimplantation mouse embryo, *Scientific Reports*. 9 (2019) 1–15.  
909 <https://doi.org/10.1038/s41598-019-49817-3>.
- 910 [9] A.H. Smits, R.G.H. Lindeboom, M. Perino, S.J. van Heeringen, G.J.C. Veenstra, M. Vermeulen,  
911 Global absolute quantification reveals tight regulation of protein expression in single  
912 Xenopuseggs, *Nucleic Acids Research*. 42 (2014) 9880–9891.  
913 <https://doi.org/10.1093/nar/gku661>.
- 914 [10] A. Alli Shaik, S. Wee, R.H.X. Li, Z. Li, T.J. Carney, S. Mathavan, J. Gunaratne, Functional  
915 mapping of the zebrafish early embryo proteome and transcriptome, *Journal of Proteome*  
916 *Research*. 13 (2014) 5536–5550. <https://doi.org/10.1021/pr5005136>.
- 917 [11] E. Lubzens, G. Young, J. Bobe, J. Cerdà, Oogenesis in teleosts: How fish eggs are formed,  
918 *General and Comparative Endocrinology*. 165 (2010) 367–389.  
919 <https://doi.org/10.1016/j.ygcen.2009.05.022>.
- 920 [12] B.J. Reading, L.K. Andersen, Y.W. Ryu, Y. Mushiobira, T. Todo, N. Hiramatsu, Oogenesis and  
921 egg quality in Finfish: Yolk formation and other factors influencing female fertility, *Fishes*. 3  
922 (2018) 1–28. <https://doi.org/10.3390/fishes3040045>.
- 923 [13] Y. Nagahama, M. Yamashita, Regulation of oocyte maturation in fish, *Development, Growth*  
924 *& Differentiation*. 50 (2008) S195–S219. <https://doi.org/10.1111/j.1440-169X.2008.01019.x>.
- 925 [14] D. Źarski, D. Kucharczyk, K. Targońska, K. Palińska, K. Kupren, P. Fontaine, P. Kestemont, A  
926 new classification of pre-ovulatory oocyte maturation stages in pikeperch, *Sander lucioperca*  
927 (L.), and its application during artificial reproduction, *Aquaculture Research*. 43 (2012) 713–  
928 721. <https://doi.org/10.1111/j.1365-2109.2011.02879.x>.
- 929 [15] D. Źarski, S. Krejszef, Á. Horváth, Z. Bokor, K. Palińska, K. Szentés, J. Łuczyńska, K. Targońska,  
930 K. Kupren, B. Urbányi, D. Kucharczyk, Dynamics of composition and morphology in oocytes of  
931 Eurasian perch, *Perca fluviatilis* L., during induced spawning, *Aquaculture*. 364–365 (2012)  
932 103–110. <https://doi.org/10.1016/j.aquaculture.2012.07.030>.

- 933 [16] L. Kleppe, R.B. Edvardsen, T. Furmanek, G.L. Taranger, A. Wargelius, Global transcriptome  
934 analysis identifies regulated transcripts and pathways activated during oogenesis and early  
935 embryogenesis in atlantic cod, *Molecular Reproduction and Development*. 81 (2014) 619–635.  
936 <https://doi.org/10.1002/mrd.22328>.
- 937 [17] H. Ma, K. Martin, D. Dixon, A.G. Hernandez, G.M. Weber, Transcriptome analysis of egg  
938 viability in rainbow trout, *Oncorhynchus mykiss*, *BMC Genomics*. 20 (2019) 1–15.  
939 <https://doi.org/10.1186/s12864-019-5690-5>.
- 940 [18] C.L. Winata, V. Korzh, The translational regulation of maternal *scp*mRNA s in time  
941 and space, *FEBS Letters*. 592 (2018) 3007–3023. <https://doi.org/10.1002/1873-3468.13183>.
- 942 [19] N. Hiramatsu, T. Todo, C. v Sullivan, J. Schilling, B.J. Reading, T. Matsubara, Y.-W. Ryu, H.  
943 Mizuta, W. Luo, O. Nishimiya, M. Wu, Y. Mushiobira, O. Yilmaz, A. Hara, Ovarian yolk  
944 formation in fishes: Molecular mechanisms underlying formation of lipid droplets and  
945 vitellogenin-derived yolk proteins., *General and Comparative Endocrinology*. 221 (2015) 1–7.  
946 <https://doi.org/10.1016/j.ygcn.2015.01.025>.
- 947 [20] B.J. Reading, C.V. Sullivan, J. Schilling, Vitellogenesis in Fishes, in: Reference Module in Life  
948 Sciences, Elsevier, 2017: pp. 635–646. <https://doi.org/10.1016/B978-0-12-809633-8.03076-4>.
- 949 [21] D. Źarski, T. Nguyen, A. le Cam, J. Montfort, G. Dutto, M.O.M.O. Vidal, C. Fauvel, J. Bobe,  
950 Transcriptomic Profiling of Egg Quality in Sea Bass (*Dicentrarchus labrax*) Sheds Light on Genes  
951 Involved in Ubiquitination and Translation, *Marine Biotechnology*. 19 (2017) 102–115.  
952 <https://doi.org/10.1007/s10126-017-9732-1>.
- 953 [22] E. Bonnet, A. Fostier, J. Bobe, Microarray-based analysis of fish egg quality after natural or  
954 controlled ovulation, *BMC Genomics*. 8 (2007) 55. <https://doi.org/10.1186/1471-2164-8-55>.
- 955 [23] R.W. Chapman, B.J. Reading, C. v Sullivan, Ovary transcriptome profiling via artificial  
956 intelligence reveals a transcriptomic fingerprint predicting egg quality in striped bass, *Morone*  
957 *saxatilis*., *PloS One*. 9 (2014) e96818. <https://doi.org/10.1371/journal.pone.0096818>.
- 958 [24] T.T. Bizuayehu, M. Mommens, A.Y.M. Sundaram, A.K.S. Dhanasiri, I. Babiak, Postovulatory  
959 maternal transcriptome in Atlantic salmon and its relation to developmental potential of  
960 embryos, *BMC Genomics*. 20 (2019) 315. <https://doi.org/10.1186/s12864-019-5667-4>.
- 961 [25] O. Yilmaz, A. Patinote, T.V. Nguyen, E. Com, R. Lavigne, C. Pineau, C. v. Sullivan, J. Bobe,  
962 Scrambled eggs: Proteomic portraits and novel biomarkers of egg quality in zebrafish (*Danio*  
963 *rerio*), *PLoS ONE*. 12 (2017) 1–24. <https://doi.org/10.1371/journal.pone.0188084>.
- 964 [26] M.-D.D. Castets, B. Schaerlinger, F. Silvestre, J.-N.N. Gardeur, M. Dieu, C. Corbier, P.  
965 Kestemont, P. Fontaine, Combined analysis of *Perca fluviatilis* reproductive performance and  
966 oocyte proteomic profile, *Theriogenology*. 78 (2012) 432–42, 442.e1–13.  
967 <https://doi.org/10.1016/j.theriogenology.2012.02.023>.
- 968 [27] A. Knoll-Gellida, M. André, T. Gattegno, J. Forgue, A. Admon, P.J. Babin, Molecular phenotype  
969 of zebrafish ovarian follicle by serial analysis of gene expression and proteomic profiling, and  
970 comparison with the transcriptomes of other animals., *BMC Genomics*. 7 (2006) 46.  
971 <https://doi.org/10.1186/1471-2164-7-46>.
- 972 [28] S. Brooks, C.R. Tyler, J.P. Sumpter, Egg quality in fish: what makes a good egg?, *Reviews in*  
973 *Fish Biology and Fisheries*. 7 (1997) 387–416. <https://doi.org/10.1023/A:1018400130692>.



- 974 [29] J. Bobe, Egg quality in fish: Present and future challenges, *Animal Frontiers*. 5 (2015) 66–72.  
975 <https://doi.org/10.2527/af.2015-0010>.
- 976 [30] J. Bobe, C. Labbé, Egg and sperm quality in fish, *General and Comparative Endocrinology*. 165  
977 (2010) 535–548. <https://doi.org/10.1016/j.ygcen.2009.02.011>.
- 978 [31] F. Soares, M.T. Dinis, F. Lahnsteiner, L. Ribeiro, Egg Quality Determination in Teleost Fish, in:  
979 *Methods in Reproductive Aquaculture*, CRC Press, 2008: pp. 149–180.  
980 <https://doi.org/doi:10.1201/9780849380549.ch4>.
- 981 [32] S. Aegerter, B. Jalabert, J. Bobe, Large scale real-time PCR analysis of mRNA abundance in  
982 rainbow trout eggs in relationship with egg quality and post-ovulatory ageing, *Molecular*  
983 *Reproduction and Development*. 72 (2005) 377–385. <https://doi.org/10.1002/mrd.20361>.
- 984 [33] H. Rime, N. Guitton, C. Pineau, E. Bonnet, J. Bobe, B. Jalabert, Post-ovulatory ageing and egg  
985 quality: a proteomic analysis of rainbow trout coelomic fluid., *Reproductive Biology and*  
986 *Endocrinology : RB&E*. 2 (2004) 26. <https://doi.org/10.1186/1477-7827-2-26>.
- 987 [34] A.M. Samarin, A.M. Samarin, T. Policar, Cellular and molecular changes associated with fish  
988 oocyte ageing, *Reviews in Aquaculture*. 11 (2019) 619–630.  
989 <https://doi.org/10.1111/raq.12249>.
- 990 [35] T. Policar, F.J.F.J. Schaefer, E. Panana, S. Meyer, S. Teerlinck, D. Toner, D. Źarski, Recent  
991 progress in European percid fish culture production technology—tackling bottlenecks,  
992 *Aquaculture International*. 27 (2019) 1151–1174. [https://doi.org/10.1007/s10499-019-00433-](https://doi.org/10.1007/s10499-019-00433-y)  
993 [y](https://doi.org/10.1007/s10499-019-00433-y).
- 994 [36] J. Lappalainen, H. Dorner, K. Wysujack, Reproduction biology of pikeperch (*Sander lucioperca*  
995 (L.)) - A review, *Ecology of Freshwater Fish*. (2003). [https://doi.org/10.1034/j.1600-](https://doi.org/10.1034/j.1600-0633.2003.00005.x)  
996 [0633.2003.00005.x](https://doi.org/10.1034/j.1600-0633.2003.00005.x).
- 997 [37] P. Fontaine, N. Wang, B. Hermelink, Broodstock management and control of the reproductive  
998 cycle, in: P. Kestemont, K. Dąbrowski, R.C. Summerfelt (Eds.), *Biology and Culture of Percid*  
999 *Fishes*, Springer Netherlands, Dordrecht, 2015: pp. 103–122. [https://doi.org/10.1007/978-94-](https://doi.org/10.1007/978-94-017-7227-3_3)  
1000 [017-7227-3\\_3](https://doi.org/10.1007/978-94-017-7227-3_3).
- 1001 [38] D. Źarski, P. Fontaine, J. Roche, M. Alix, M. Blecha, C. Broquard, J. Król, S. Milla, Time of  
1002 response to hormonal treatment but not the type of a spawning agent affects the  
1003 reproductive effectiveness in domesticated pikeperch, *Sander lucioperca*, *Aquaculture*. 503  
1004 (2019) 527–536. <https://doi.org/10.1016/j.aquaculture.2019.01.042>.
- 1005 [39] D. Źarski, I. ben Ammar, G. Bernáth, S. Baekelandt, Z. Bokor, K. Palińska-Źarska, P. Fontaine,  
1006 Á. Horváth, P. Kestemont, S.N.M. Mandiki, Repeated hormonal induction of spermiation  
1007 affects the stress but not the immune response in pikeperch (*Sander lucioperca*), *Fish &*  
1008 *Shellfish Immunology*. 101 (2020) 143–151. <https://doi.org/10.1016/j.fsi.2020.03.057>.
- 1009 [40] J. Kristan, A. Stara, M. Polgesek, A. Drasovean, J. Kolarova, J. Priborsky, M. Blecha, P. Svacina,  
1010 T. Policar, J. Velisek, Efficacy of different anaesthetics for pikeperch (*Sander Lucioperca L*) in  
1011 relation to water temperature, in: *Neuroendocrinology Letters*, Maghira and Maas  
1012 Publications, 2014: pp. 81–85. [http://www.scopus.com/inward/record.url?eid=2-s2.0-](http://www.scopus.com/inward/record.url?eid=2-s2.0-84928988842&partnerID=tZOtx3y1)  
1013 [84928988842&partnerID=tZOtx3y1](http://www.scopus.com/inward/record.url?eid=2-s2.0-84928988842&partnerID=tZOtx3y1).

- 1014 [41] D. Źarski, K. Palińska, K. Targońska, Z. Bokor, L. Kotrik, S. Krejszeff, K. Kupren, Á. Horváth, B.  
1015 Urbányi, D. Kucharczyk, Oocyte quality indicators in Eurasian perch, *Perca fluviatilis* L., during  
1016 reproduction under controlled conditions, *Aquaculture*. 313 (2011) 84–91.  
1017 <https://doi.org/10.1016/j.aquaculture.2011.01.032>.
- 1018 [42] D. Źarski, S. Krejszeff, K. Palińska, K. Targońska, K. Kupren, P. Fontaine, P. Kestemont, D.  
1019 Kucharczyk, Cortical reaction as an egg quality indicator in artificial reproduction of pikeperch,  
1020 *Sander lucioperca*, *Reproduction, Fertility and Development*. 24 (2012) 843.  
1021 <https://doi.org/10.1071/RD11264>.
- 1022 [43] J. Roche, D. Źarski, A. Khendek, I. ben Ammar, C. Broquard, A. Depp, Y. Ledoré, T. Policar, P.  
1023 Fontaine, S. Milla, D1, but not D2, dopamine receptor regulates steroid levels during the final  
1024 stages of pikeperch gametogenesis, *Animal*. 12 (2018) 2587–2597.  
1025 <https://doi.org/10.1017/S1751731118000824>.
- 1026 [44] B.I. Cejko, R.K. Kowalski, D. Kucharczyk, K. Targońska, S. Krejszeff, D. Źarski, J. Glogowski,  
1027 Influence of the length of time after hormonal stimulation on selected parameters of milt of  
1028 ide *Leuciscus idus* L., *Aquaculture Research*. 41 (2010) 804–813.  
1029 <https://doi.org/10.1111/j.1365-2109.2009.02357.x>.
- 1030 [45] F.J.J. Schaefer, J.L.L. Overton, J. Bossuyt, D. Źarski, W. Kloas, S. Wuertz, Management of  
1031 pikeperch *Sander lucioperca* (Linnaeus, 1758) sperm quality after stripping, *Journal of Applied*  
1032 *Ichthyology*. 32 (2016) 1099–1106. <https://doi.org/10.1111/jai.13144>.
- 1033 [46] M. Alix, D. Źarski, D. Chardard, P. Fontaine, B. Schaerlinger, D. Zarski, D. Chardard, P.  
1034 Fontaine, B. Schaerlinger, Deformities in newly hatched embryos of Eurasian perch  
1035 populations originating from two different rearing systems, *Journal of Zoology*. 302 (2017)  
1036 126–137. <https://doi.org/10.1111/jzo.12447>.
- 1037 [47] D. Źarski, A. le Cam, J. Nynca, C. Klopp, S. Ciesielski, B. Sarosiek, J. Montfort, J. Król, P.  
1038 Fontaine, A. Ciereszko, J. Bobe, Domestication modulates the expression of genes involved in  
1039 neurogenesis in high-quality eggs of *Sander lucioperca*, *Molecular Reproduction and*  
1040 *Development*. 87 (2020) 934–951. <https://doi.org/10.1002/mrd.23414>.
- 1041 [48] J. Nynca, D. Źarski, J. Bobe, A. Ciereszko, Domestication is associated with differential  
1042 expression of pikeperch egg proteins involved in metabolism, immune response and protein  
1043 folding, *Animal*. 14 (2020) 2336–2350. <https://doi.org/10.1017/S1751731120001184>.
- 1044 [49] R. Edgar, M. Domrachev, A.E. Lash, Gene Expression Omnibus: NCBI gene expression and  
1045 hybridization array data repository, *Nucleic Acids Research*. 30 (2002) 207–210.  
1046 <https://doi.org/10.1093/nar/30.1.207>.
- 1047 [50] M.M. Bradford, A rapid and sensitive method for the quantitation of microgram quantities of  
1048 protein utilizing the principle of protein-dye binding, *Analytical Biochemistry*. 72 (1976) 248–  
1049 254. [https://doi.org/10.1016/0003-2697\(76\)90527-3](https://doi.org/10.1016/0003-2697(76)90527-3).
- 1050 [51] J. Cox, M.Y. Hein, C.A. Luber, I. Paron, N. Nagaraj, M. Mann, Accurate Proteome-wide Label-  
1051 free Quantification by Delayed Normalization and Maximal Peptide Ratio Extraction, Termed  
1052 MaxLFQ, *Molecular & Cellular Proteomics*. 13 (2014) 2513–2526.  
1053 <https://doi.org/10.1074/mcp.M113.031591>.
- 1054 [52] Y. Li, Y. Sun, A. Ni, L. Shi, P. Wang, A.M. Isa, P. Ge, L. Jiang, J. Fan, H. Ma, G. Yang, J. Chen,  
1055 *Seminal Plasma Proteome as an Indicator of Sperm Dysfunction and Low Sperm Motility in*

- 1056 Chickens, *Molecular & Cellular Proteomics* : MCP. 19 (2020) 1035–1046.  
1057 <https://doi.org/10.1074/mcp.RA120.002017>.
- 1058 [53] J.A. Vizcaíno, E.W. Deutsch, R. Wang, A. Csordas, F. Reisinger, D. Ríos, J.A. Dienes, Z. Sun, T.  
1059 Farrah, N. Bandeira, P.-A. Binz, I. Xenarios, M. Eisenacher, G. Mayer, L. Gatto, A. Campos, R.J.  
1060 Chalkley, H.-J. Kraus, J.P. Albar, S. Martinez-Bartolomé, R. Apweiler, G.S. Omenn, L. Martens,  
1061 A.R. Jones, H. Hermjakob, ProteomeXchange provides globally coordinated proteomics data  
1062 submission and dissemination, *Nature Biotechnology*. 32 (2014) 223–226.  
1063 <https://doi.org/10.1038/nbt.2839>.
- 1064 [54] S.X. Ge, D. Jung, R. Yao, ShinyGO: a graphical gene-set enrichment tool for animals and  
1065 plants, *Bioinformatics*. 36 (2020) 2628–2629. <https://doi.org/10.1093/bioinformatics/btz931>.
- 1066 [55] P. Bardou, J. Mariette, F. Escudié, C. Djemiel, C. Klopp, jvenn: an interactive Venn diagram  
1067 viewer, *BMC Bioinformatics*. 15 (2014) 293. <https://doi.org/10.1186/1471-2105-15-293>.
- 1068 [56] R.J. White, J.E. Collins, I.M. Sealy, N. Wali, C.M. Dooley, Z. Digby, D.L. Stemple, D.N. Murphy,  
1069 K. Billis, T. Hourlier, A. Füllgrabe, M.P. Davis, A.J. Enright, E.M. Busch-Nentwich, A high-  
1070 resolution mRNA expression time course of embryonic development in zebrafish, *ELife*. 6  
1071 (2017) 1–32. <https://doi.org/10.7554/eLife.30860>.
- 1072 [57] A. Untergasser, H. Nijveen, X. Rao, T. Bisseling, R. Geurts, J.A.M. Leunissen, Primer3Plus, an  
1073 enhanced web interface to Primer3, *Nucleic Acids Research*. 35 (2007) W71–W74.  
1074 <https://doi.org/10.1093/nar/gkm306>.
- 1075 [58] Z. Dwight, R. Palais, C.T. Wittwer, uMELT: prediction of high-resolution melting curves and  
1076 dynamic melting profiles of PCR products in a rich web application, *Bioinformatics*. 27 (2011)  
1077 1019–1020. <https://doi.org/10.1093/bioinformatics/btr065>.
- 1078 [59] M. Mommens, J.M. Fernandes, K. Tollefsen, I.A. Johnston, I. Babiak, Profiling of the  
1079 embryonic Atlantic halibut (*Hippoglossus hippoglossus* L.) transcriptome reveals maternal  
1080 transcripts as potential markers of embryo quality, *BMC Genomics*. 15 (2014) 829.  
1081 <https://doi.org/10.1186/1471-2164-15-829>.
- 1082 [60] V. Colson, M. Cousture, D. Damasceno, C. Valotaire, T. Nguyen, A. le Cam, J. Bobe, Maternal  
1083 temperature exposure impairs emotional and cognitive responses and triggers dysregulation  
1084 of neurodevelopment genes in fish, *PeerJ*. 2019 (2019). <https://doi.org/10.7717/peerj.6338>.
- 1085 [61] J. Cosson, Fish Sperm Physiology: Structure, Factors Regulating Motility, and Motility  
1086 Evaluation, in: *Biological Research in Aquatic Science*, IntechOpen, 2019.  
1087 <https://doi.org/10.5772/intechopen.85139>.
- 1088 [62] E.S. Litscher, P.M. Wassarman, *The Fish Egg's Zona Pellucida*, 1st ed., Elsevier Inc., 2018.  
1089 <https://doi.org/10.1016/bs.ctdb.2018.01.002>.
- 1090 [63] T. Rocha de Almeida, M. Alix, A. le Cam, C. Klopp, J. Montfort, L. Toomey, Y. Ledoré, J. Bobe,  
1091 D. Chardard, B. Schaerlinger, P. Fontaine, Domestication may affect the maternal mRNA  
1092 profile in unfertilized eggs, potentially impacting the embryonic development of Eurasian  
1093 perch (*Perca fluviatilis*), *PLOS ONE*. 14 (2019) e0226878.  
1094 <https://doi.org/10.1371/journal.pone.0226878>.
- 1095 [64] M. Lopes-Ferreira, G.S. Magalhães, J.H. Fernandez, I.D.L.M. Junqueira-De-Azevedo, P. le Ho,  
1096 C. Lima, R.H. Valente, A.M. Moura-Da-Silva, Structural and biological characterization of

- 1097 Nattectin, a new C-type lectin from the venomous fish *Thalassophryne nattereri*, *Biochimie.*  
1098 93 (2011) 971–980. <https://doi.org/10.1016/j.biochi.2011.03.001>.
- 1099 [65] A. Wargelius, T. Furmanek, J. Montfort, A. le Cam, L. Kleppe, A. Juanchich, R.B. Edvardsen,  
1100 G.L. Taranger, J. Bobe, A comparison between egg transcriptomes of cod and salmon reveals  
1101 species-specific traits in eggs for each species, *Molecular Reproduction and Development.* 82  
1102 (2015) 397–404. <https://doi.org/10.1002/mrd.22487>.
- 1103 [66] C. v Sullivan, R.W. Chapman, B.J. Reading, P.E. Anderson, Transcriptomics of mRNA and egg  
1104 quality in farmed fish: Some recent developments and future directions, *General and*  
1105 *Comparative Endocrinology.* 221 (2015) 23–30. <https://doi.org/10.1016/j.ygcen.2015.02.012>.
- 1106 [67] M. Mommens, J.M. Fernandes, T.T. Bizuayehu, S.L. Bolla, I. a Johnston, I. Babiak, Maternal  
1107 gene expression in Atlantic halibut (*Hippoglossus hippoglossus* L.) and its relation to egg  
1108 quality, *BMC Research Notes.* 3 (2010) 138. <https://doi.org/10.1186/1756-0500-3-138>.
- 1109 [68] H. Izumi, K. Gen, P.M. Lokman, S. Hagihara, M. Horiuchi, T. Tanaka, S. Ijiri, S. Adachi, Maternal  
1110 transcripts in good and poor quality eggs from Japanese eel, *Anguilla japonica*—their  
1111 identification by large-scale quantitative analysis, *Molecular Reproduction and Development.*  
1112 86 (2019) 1846–1864. <https://doi.org/10.1002/mrd.23273>.
- 1113 [69] J.N. Myers, N. Chatakondi, R.A. Dunham, I.A.E. Butts, Genetic architecture of early life history  
1114 traits for channel catfish, *Ictalurus punctatus* ♀ × blue catfish, *I. furcatus* ♂ hybrid  
1115 production, *Aquaculture.* (2019) 734436. <https://doi.org/10.1016/j.aquaculture.2019.734436>.
- 1116 [70] J. Duan, L. Zhu, H. Dong, X. Zheng, Z. Jiang, J. Chen, X.C. Tian, Analysis of mRNA abundance  
1117 for histone variants, histone- and DNA-modifiers in bovine in vivo and in vitro oocytes and  
1118 embryos, *Scientific Reports.* 9 (2019) 1217. <https://doi.org/10.1038/s41598-018-38083-4>.
- 1119 [71] H.-Y. Wang, L. Zhou, J.-F. Gui, Identification of a putative oocyte-specific small nuclear  
1120 ribonucleoprotein polypeptide C in gibel carp, *Comparative Biochemistry and Physiology Part*  
1121 *B: Biochemistry and Molecular Biology.* 146 (2007) 47–52.  
1122 <https://doi.org/10.1016/j.cbpb.2006.09.002>.
- 1123 [72] D. Gao, T. Xu, X. Qi, W. Ning, S. Ren, Z. Ru, K. Ji, Y. Ma, T. Yu, Y. Li, Z. Cao, Y. Zhang, CLAUDIN7  
1124 modulates trophectoderm barrier function to maintain blastocyst development in pigs,  
1125 *Theriogenology.* 158 (2020) 346–357. <https://doi.org/10.1016/j.theriogenology.2020.09.038>.
- 1126 [73] A. Vite, J. Li, G.L. Radice, New functions for alpha-catenins in health and disease: from cancer  
1127 to heart regeneration, *Cell and Tissue Research.* 360 (2015) 773–783.  
1128 <https://doi.org/10.1007/s00441-015-2123-x>.
- 1129 [74] A.P.A. van Montfoort, J.P.M. Geraedts, J.C.M. Dumoulin, A.P.M. Stassen, J.L.H. Evers, T.A.Y.  
1130 Ayoubi, Differential gene expression in cumulus cells as a prognostic indicator of embryo  
1131 viability: a microarray analysis, *Molecular Human Reproduction.* 14 (2008) 157–168.  
1132 <https://doi.org/10.1093/molehr/gam088>.
- 1133 [75] S.J. Bultman, T.C. Gebuhr, H. Pan, P. Svoboda, R.M. Schultz, T. Magnuson, Maternal BRG1  
1134 regulates zygotic genome activation in the mouse, *Genes & Development.* 20 (2006) 1744–  
1135 1754. <https://doi.org/10.1101/gad.1435106>.
- 1136 [76] R.M. Schultz, J.J. Eppig, Challenges to making an egg, *Nature Cell Biology.* 23 (2021) 9–10.  
1137 <https://doi.org/10.1038/s41556-020-00622-5>.

1138 [77] A. Rodriguez, S.M. Briley, B.K. Patton, S.K. Tripurani, K. Rajapakshe, C. Coarfa, A. Rajkovic, A.  
1139 Andrieux, A. Dejean, S.A. Pangas, Loss of the E2 SUMO-conjugating enzyme Ube2i in oocytes  
1140 during ovarian folliculogenesis causes infertility in mice, *Development*. 146 (2019) dev176701.  
1141 <https://doi.org/10.1242/dev.176701>.

1142 [78] J.-L. Zhu, S.-L. Lin, M. Li, Y.-C. Ouyang, Y. Hou, H. Schatten, Q.-Y. Sun, Septin2 is modified by  
1143 SUMOylation and required for chromosome congression in mouse oocytes, *Cell Cycle*. 9  
1144 (2010) 1607–1616. <https://doi.org/10.4161/cc.9.8.11463>.

1145 [79] I. Adrian-Kalchhauser, S.E. Sultan, L.N.S. Shama, H. Spence-Jones, S. Tiso, C.I. Keller Valsecchi,  
1146 F.J. Weissing, Understanding “Non-genetic” Inheritance: Insights from Molecular-Evolutionary  
1147 Crosstalk, *Trends in Ecology & Evolution*. 35 (2020) 1078–1089.  
1148 <https://doi.org/10.1016/j.tree.2020.08.011>.

1149

1150

1151 **Supplementary information:**

1152

1153 **Supplementary file 1:** Schematic diagram illustrating the Gene Ontology analysis strategy  
1154 applied during the functional analysis of the transcriptome and proteome obtained from high-  
1155 quality pikeperch eggs.

1156

1157 **Supplementary file 2:** Primers used for qPCR validation of candidate genes for biomarkers of  
1158 egg quality in pikeperch.

1159

1160 **Supplementary file 3:** List of genes identified in high-quality pikeperch eggs (n=8). For each  
1161 entry, the gene name and accession number of the human homolog were provided, except for  
1162 those identified as duplicates (when different genes mapped to the same protein) and fish-  
1163 specific genes. In addition, the mean intensity signal (for n=8) was provided, and genes were  
1164 arranged in descending order of signal intensity.

1165

1166 **Supplementary file 4:** List of all proteins identified in high-quality pikeperch eggs (n=8). For  
1167 each entry accession number, the mean signal intensity and protein score (i.e., number of

1168 samples in which particular protein was present) are given. Proteins are presented in descending  
1169 order based on signal intensity.

1170

1171 **Supplementary file 5:** List of abundant (present in at least 50% of the samples) proteins in  
1172 high-quality pikeperch eggs (n=8). Each entry-associated gene name and accession number (for  
1173 human homolog) was provided, except for the fish-specific proteins. In addition, the mean  
1174 intensity signal (for n=8) was provided, and genes were arranged in descending order based on  
1175 signal intensity.

1176

1177 **Supplementary file 6:** Higher level Gene Ontology categories (in alphabetic order) identified  
1178 for whole transcriptome and proteome data obtained from high-quality pikeperch eggs (n=8).  
1179 For each category, the numbers of genes and proteins identified in either the transcriptome or  
1180 proteome are provided.

1181

1182 **Supplementary file 7:** Most enriched (top 500 biological processes) ontology terms obtained  
1183 during transcriptomic and proteomic profiling of high-quality pikeperch eggs. The ontological  
1184 terms were split into transcriptome-specific, proteome-specific and conspecific groups.

1185

1186 **Supplementary file 8:** Results of the ontology analysis (enrichment analysis of biological  
1187 processes and KEGG pathways) of transcriptome-specific, proteome-specific and conspecific  
1188 subsets of genes/proteins obtained from high-quality pikeperch eggs based on clusters obtained  
1189 in the analysis presented in Fig. 5.

1190

1191 **Supplementary file 9:** List of 85 differentially expressed genes (DEGs) identified in  
1192 transcriptomic profiling of pikeperch eggs characterized by high (n=5) and low (n=5) quality.

1193 For each entry gene name, the protein name (encoded by the respective gene), accession number  
1194 and human homolog (whenever available) used for functional analysis are presented.  
1195 Additionally, zebrafish homologs used during the evaluation of expression levels during  
1196 zebrafish development were provided whenever they could be identified. In addition, the fold  
1197 change difference (between high and low egg quality) in expression was also provided. Genes  
1198 are arranged alphabetically based on gene name.

1199

1200
